# Supplementary material for: Abusive Supervision: A Systematic Review and New Research Approaches
Source: Frontiers journal article supplement (doi:10.3389/fcomm.2021.640908), 2022-01-06
Supplement: Table_1.xlsx [file Table_1.xlsx]

## Sheet: Annexed table
No.	Reference	Year	Definition	Theoretical framework	Mechanisms researched	Research Method	Sample(s)	Measures and scales of abusive supervision	Research Findings	Limitations
1	Adams and Webster (2013)	2013	None.	Emotional labour.	Study 1, surface acting mediated the positive relation between three interpersonal mistreatment and outcomes. Study 2, replicated study 1, plus deep acting partially mediated the relation between three interpersonal mistreatment and outcomes.	Two cross-sectional studies in USA. Both studies investigate interpersonal mistreatment by supervisors on subordinates.	Study 1, was employed members of an alumni association of a university (N= 256). Study 2, was engineering employed (N= 250).	Applied the abusive supervision 15-items scale from Tepper's (2000) to measure interpersonal mistreatment by supervisor.	Study 1, the supervisor interpersonal mistreatment was significantly correlated with distress and surface acting. On Study 2, was found the supervisor interpersonal mistreatment correlated with psychological distress and surface acting.	The data was cross-sectional and gathered via self reports. Also, the measure for emotional regulation was nonspecific.
2	Agarwal (2019)	2019	Definition of abusive supervision from Tepper's (2000) was used.	Conservation of resources theory.	LMX moderated the positive relation between abusive supervision and outcomes via PsyCap.	One longitudinal study in India (T1 and T2, two weeks apart). Investigate on subordinates their perception of abusive supervision.	Employed working in wide variety of sectors (N= 1193).	Was applied on subordinates the abusive supervision 15-items scale from Tepper's (2000).	The interaction of abusive supervision with LMX was significant in predicting PsyCap, as well, moderating the LMX was found significant for abusive supervision, turnover intention and stress.	Cannot be ruled out alternative explanations to the researched model. And, did not cover all sectors.
3	Agarwal and Avey (2020)	2020	Definition of abusive supervision from Tepper's (2000) was used.	Conservation of resources theory.	PsyCap partially mediated the positive relation between abusive supervision and cyberloafing, and psychological contract breach (PCB) moderated the relation.	One cross-sectional study in India. Investigate on subordinates their perception of abusive supervision.	Employed from six organizations (N= 394).	Was applied on subordinates the 15-items scale from Tepper's (2000).	Was found related AS to cyberloafing, and PsyCap partially mediated this relation.	The cross-sectional limited make causal inferences, and self-reported measures may be influence by common method variance.
4	Ahmad et al. (2019a)	2019	Definition of abusive supervision from Tepper's (2000) was used.	Social interaction theory of aggression and revenge theory.	Both studies proposed moderated mediation model, supervisor’s psychological closeness moderate the positive relation between subordinate gossip and abusive supervision trough supervisor revenge thoughts.	Two studies in China. Study 1, a longitudinal study (T1 and T2, one month apart). Investigate on dyads the intentions of their own abusive supervisory intentions from supervisor towards their subordinates. Study 2, a daily study (T1 five consecutive days, and T2 one month apart), investigate same of study 1.	Study 1, dyads of supervisor and subordinate in a retail company (N= 422). Study 2, dyads of supervisor and subordinate in multiple manufacturing companies (N= 96).	Was applied on supervisors the abusive supervision active-aggressive 5-items from Mitchell and Ambrose 10-items scale (2007).	Study 1, was found positively related subordinate gossip behavior to abusive supervision, and positively related supervisor revenge thoughts to abusive supervision. On Study 2, was found as well, the results of study 1, and a significant indirect effect of subordinate gossip behavior on abusive supervision through supervisor revenge thoughts.	The research was only focused on one mechanism, also, the samples was from the same city. And, the mechanism only was on antecedents of abusive supervision.
5	Ahmad et al. (2019b)	2019	Definition of abusive supervision from Tepper's (2000) was used.	Conservation of resources theory, and broaden and build theory.	Psychological capital (PsyCap) mediated the positive and negative relation between abusive supervision and outcomes.	One longitudinal study in Pakistan (T1 and T2, one week apart). Investigate on subordinates their perception of abusive supervision.	University members (N= 408).	Was applied on subordinates the abusive supervision 15-items scale from Tepper's (2000).	Negatively related abusive supervision to psychological capital, individual-directed organizational citizenship behavior, organization-directed organizational citizenship behavior; and, positively related to individual-directed counterproductive work behavior and organization-directed counterproductive work behavior.	Two variables was rated by the same individual (abusive supervision and PsyCap), also, the data was collected from university staff.
6	Akram et al. (2019)	2019	Definition of abusive supervision from Tepper's (2000) was used.	Conservation of resources theory.	Job demands moderated, and emotional exhaustion mediated the positive relation between abusive supervision and CWB.	One longitudinal study in China (T1, T2 and T3, one month apart). Investigate on dyads the subordinates perception of abusive supervision.	Dyads of supervisor and subordinate from manufacturing firms (N= 350).	Was applied on subordinates only 5-items, from the 15-items scale from Tepper's (2000).	Abusive supervision positively related with counterproductive work behavior and emotional exhaustion.	The data was collected on different point of time and not confirm causality, as well, was from manufacturing sector in Asia.
7	Al-Hawari et al. (2020)	2020	Definition of abusive supervision from Tepper's (2000) was used.	Conservation of resources theory.	Emotional exhaustion mediated the negative relationship between abusive supervision and customer incivility with capacity to satisfy customers and service performance.	One longitudinal study in United Arab Emirates (T1and T2 three weeks apart, and T3 after the T2). Investigate on dyads the subordinates perception of abusive supervision.	Dyads of supervisor and subordinate frontline employed from variety of organization (N= 192).	Was applied on subordinates only the active-aggressive 5-items from Mitchell and Ambrose 10-items scale (2007).	Was found positively related AS to emotional exhaustion and customer incivility, also was found a negative relation between AS and service performance and the capacity to satisfy customers.	The variable incivility were measured from the same perspective, also AS were measured from employee perception and did not measure the frequency of this variable.
8	Arif et al. (2017)	2017	Definition of abusive supervision from Tepper's (2000) was used.	None.	Organization-based self-esteem moderated the positive and negative relation between abusive supervision and outcomes, and future work self-salience mediated this relation.	One cross-sectional study in Pakistan. Investigate on subordinates their perception of abusive supervision.	Employed from telecom organizations (N= 452).	Was applied on subordinates the abusive supervision 10-items scale from Mitchell and Ambrose (2007).	Abusive supervision significantly affects employees turnover intentions and future work self salience.	None.
9	Avey et al. (2015)	2015	Definition of abusive supervision from Tepper's (2000) was used.	Power dependence theory and learned helplessness theory.	The positive and negative relation between abusive supervision and outcomes, was mediated by job frustration, and moderated by job embeddedness.	One longitudinal study in USA (T1, T2 and T3, two weeks apart). Investigate on dyads the subordinates perception of abusive supervision.	Dyads of supervisor and subordinate from aerospace company (N= 603).	Was applied on subordinates only 8-items from the 15-items scale from Tepper's (2000).	The relationship between abusive supervision and job frustration was stronger, and positive when job embeddedness was low.	The multisource data, the temporal separation, and a variable who helped to reduce common bias.
10	Barnes et al. (2015)	2015	Definitions of abusive supervision from Tepper's (2000 & 2007) was used.	Ego depletion theory.	An mediation model of leader sleep quantity and quality, between abusive supervision via ego depletion and unit work engagement.	One daily study in Italy (two weeks period). Investigate on work teams the subordinates perception of daily abusive behaviors.	Work groups from a data base of public and private firms (N= 261 subordinates, and N= 99 supervisors, total N=360).	Was applied on subordinates the 5-items scale from Johnson et al. (2012).	Positively related daily leader ego depletion to daily abusive supervision, and significant indirect effect of daily sleep quality on daily abusive supervisor behavior via daily leader ego depletion.	Variables was not manipulate or was used random techniques, also, was not examined the subordinates sleep effects.
11	Biron (2010)	2010	Definitions of abusive supervision from Tepper's (2000 & 2007) was used.	Social exchange theory.	Perceived abusive supervision and perceived organizational support moderated the negative relation between perceived organizational ethical values and organizational deviance.	One cross-sectional study in Israel. Investigate on subordinates their perception of abusive supervision.	Employed from different companies (N= 311).	Was applied on subordinates the abusive supervision 15-items scale from Tepper's (2000).	Positive relationship between organizational deviance and abusive supervision, as well, was found when the level of abusive supervision is low, organizational deviance decreases as organizational values become more strict.	Was a self-reported data, and these may be biased, also, was collected only on one time period. As well, the threat of common method variance is important to noted.
12	Bowling and Michel (2011)	2011	Definition of abusive supervision from Tepper's (2000) was used.	Attribution-based theory of workplace harassment.	Target attributions (self-directed, supervisor-directed, and organization-directed) moderated the negative relation between abusive supervision and outcomes.	One longitudinal study in USA (T1 and T2, one month apart). Investigate on subordinates their perception of abusive supervision.	Employed from StudyResponse database (N= 381).	Was applied on subordinates the abusive supervision 15-items scale from Tepper's (2000).	A negative related abusive supervision with job satisfaction and psychological health; as well, was found positive related abusive supervision with counterproductive work behaviors directed at supervisor and organization. As well, abusive supervision was found significantly related to self-directed attributions and organization directed attributions, but was found not significantly related to sup…	Was a self-reported data, who made a vulnerable effect of common method variance, and the causal relation between variables was unable to gather, as well, the design didn't measure the variables multiple times.
13	Brees et al. (2016)	2016	Definition of abusive supervision from Tepper's (2000) was used.	Trait activation theory.	Hostile attribution styles, negative affectivity, trait anger, and entitlement are related with subordinates perception of abusive supervision.	One cross-sectional study in USA. Investigate on subordinates hypothetical situations by video about the perception of abusive supervision.	Employed from variety of companies and job type (N= 756).	Was applied on subordinates the abusive supervision 15-items scale from Tepper's (2000).	Abusive supervision was positively associated hostile attribution, subordinate negative affectivity, trait anger and entitlement.	The relatively small sample of behavior displayed on the controlled video, also the usage of a modified scale to measure abusive supervision.
14	Breevaart and De Vries (2017)	2017	Definition of abusive supervision from Tepper's (2000) was used.	Big five personality.	Supervisor's honesty-humility, supervisor's agreeableness, emotionality, extraversion, conscientiousness, and openness to experience are negative related with subordinates perception of abusive supervision.	One cross-sectional study in Netherlands. Investigate on dyads the subordinates perception of abusive supervision.	Dyads of supervisor and subordinate from variety of companies (N= 107).	Was applied on subordinates only the 15-items scale from Tepper's (2000).	Subordinate perception of abusive supervision were negatively related to honesty-humility and agreeableness. And, emotionality, extraversion, conscientiousness, and openness to experience were found unrelated to subordinate perceptions of abusive supervision.	Examine different personality frameworks simultaneously would be worthwhile.
15	Burton and Barber (2019)	2019	Definition of abusive supervision from Tepper's (2000) was used.	Social exchange theory.	Study 1, interactional justice mediates the positive relation between abusive supervision and retaliation, all is moderated by mindfulness. Study 2, the same model of study 1, but mindfulness only moderated the positive relation between abusive supervision and interactional justice.	Two studies in USA. Study 1, a cross-sectional study (the measures were collected with two surveys, two weeks apart). Investigate on subordinates their perception of abusive supervision. Study 2, an experimental laboratory scenario study. Investigate, the same of study 1.	Study 1, employed registered with Amazon’s MTurk (N= 232). Study 2, undergraduate students from university (N= 263).	Study 1, was applied on subordinates the abusive supervision 15-items scale from Tepper's (2000). Study 2, was applied on subordinates only 6-items from the 15-items scale from Tepper's (2000).	Study 1, abusive supervision was found negatively related to interactional justice and positively related to supervisor-directed retaliation, employee trait mindfulness was found negatively related to employee ratings of abusive supervision. Study 2, was found interactional justice mediated the relations between abusive supervision condition and intended retaliation.	Study 1, data was collected from the same source. Study 2, was the used of written scenarios asking a hypothetical situation.
16	Burton and Hoobler (2011)	2011	Definition of abusive supervision from Tepper's (2000) was used.	Self-verification theory.	Interactional justice mediates the relation between perceptions of abusive supervision and workplace aggression, and this last relation was moderated by narcissism.	One cross-sectional study in USA. Investigate on subordinates their perception of abusive supervision.	Students who were also employed worked in a variety of professional fields (N= 262).	Was applied on subordinates the abusive supervision 15-items scale from Tepper's (2000).	Interactional justice was found a significant mediating effect between abusive supervision and interpersonal aggression, as well, was found a strong relationship between abusive supervision and interpersonal aggression.	The variables were from same source and method, also for the method applied to collect data were not possible estimate response rate.
17	Burton et al. (2012)	2012	Definition of abusive supervision from Tepper's (2000) was used.	Theory of displaced aggression.	Supervisor exercise moderates the positive relation between supervisor perceptions of workplace stress, and employee perceptions of abusive supervision.	One cross-sectional study in USA. Investigate on dyads the subordinates perception of abusive supervision.	Dyads of MBA students from two universities, who were also employed and their supervisors (N=98).	Was applied on subordinates only the 15-items scale from Tepper's (2000).	Supervisor stress was found significantly related to employee perceptions of abusive supervision. As well, was found supervisor perceptions of stress and exercise not significantly related.	The fitness levels were not measured, also because the data were cross-sectional, was not possible to measure the variables at different times.
18	Camps et al. (2016)	2016	Definition of abusive supervision from Tepper's (2000) was used.	Big five personality.	The relation between supervisors’ personality traits (agreeableness, conscientiousness, extraversion, openness to experience and neuroticism) and employees 'experiences of abusive supervision.	One cross-sectional study in Belgium. Investigate on dyads the subordinates perception of abusive supervision.	Dyads of supervisor and subordinate from variety of industries (N= 103).	Was applied on subordinates the abusive supervision active-aggressive 5-items from Mitchell and Ambrose 10-items scale(2007).	Supervisors 'conscientiousness was found positively related to abusive supervision. And, agreeableness, extraversion, neuroticism, and openness were not significantly related.	Were not included lower facets of each personality trait, also, the research were only on supervisor big five personality, and not on employees personality as well. And, the measure of abusive supervision capture only employees perceptions and not supervisory behavior.
19	Camps et al. (2020)	2020	Definition of abusive supervision from Tepper's (2000) was used.	Uncertainty management theory.	On both studies, self-doubt moderated the relation between abusive followership and abusive supervisor via interpersonal justice.	Two studies. Study 1, a cross-sectional study in Belgium. Investigate on triads the subordinate perception of abusive supervision. Study 2, were separated on study 2a and 2b. Study 2a did not measured AS. Study 2b, a experimental study (country not mentioned). Investigate on supervisors own abusive behavior perception.	Study 1, triads of supervisor, subordinate and coworker from different organizations (N= 122). Study 2b, university students (N= 312).	Both studies, applied the 15-items scale from Tepper's (2000).	Study 1, was found positively related abusive followership and AS, and interpersonal justice was negatively related to AS. Study 2b, found that were more likely to engage on AS supervisors with low-level of self-doubt.	In the study 1, the cross-sectional design did not allow test the causality. The sample of study 2b were students with low working experienced.
20	Chen and Liu (2019)	2019	Definition of abusive supervision from Tepper's (2000) was used.	Attribution theory and social identity theory.	Supervisor directed attribution as mediator, and LMX as moderated the relation between abusive supervision and outcomes.	One longitudinal study in Taiwan (T1 and T2, four weeks apart). Investigate on subordinates their perception of vicarious abusive supervision over their peers'.	Students from several universities (N=336).	Was applied on subordinates modified for peers' the abusive supervision 15-items scale from Tepper's (2000).	Was found significant the relation between vicarious abusive supervision and LMX on supervisor-directed attribution, also, vicarious abusive supervision was found a positive significant with supervisor-directed attribution.	The variables were measured with self-reported, also the sample was Taiwanese workers, who had higher tolerance to abusive supervision by cultural characteristics.
21	Chi et al. (2018)	2018	Definition of abusive supervision from Tepper's (2000) was used.	Social learning theory.	Surface acting mediated the positive relation between abusive supervision and service sabotage, and perceived supervisor power moderated the model.	One longitudinal study in Taiwan (T1 and T2, two weeks apart). Investigate on dyads the subordinates perception of abusive supervision.	Dyads of supervisor and subordinate from diverse industries (N= 186).	Was applied on subordinates only the abusive supervision active-aggressive 5-items from Mitchell and Ambrose 10-items scale(2007).	Abusive supervision was found positively related to service sabotage and surface acting. And, perceived supervisor power had no effect on the relation between abusive supervision and surface acting.	Two variables from subordinate and supervisor where measured on the same time, and this couldn't dismiss common method variance, also, the variables related to services were only rated by the supervisor, but not for the costumers.
22	Choi et al. (2019)	2019	Definition of abusive supervision from Tepper's (2000) was used.	Social exchange theory.	LMX mediated the negative relation between abusive supervision and employee knowledge sharing. Also, psychological contract fulfillment, and self-enhancement motive moderated the model.	One cross-sectional study in South Korea. Investigate on dyads the subordinates perception of abusive supervision.	Dyads of supervisor and subordinate from diverse industries (N= 175).	Was applied on subordinates only the abusive supervision 15-items scale from Tepper's (2000).	Abusive supervision was found negatively related to knowledge sharing, as well, was found a negative relation between abusive supervision and LMX, when is high the employee’s self-enhancement motive.	Was a cross-sectional design, a risk for common variance, and employee knowledge sharing was only rated by the supervisor.
23	Chu (2014)	2014	Definition of abusive supervision from Tepper's (2000) was used.	Social exchange theory and power dependence theory.	Toxic emotions at work mediated the positive and negative relation between abusive supervision and outcomes.	One longitudinal study in Taiwan (T1 and T2, two months apart). Investigate on subordinates their perception of abusive supervision.	Nurses from six different hospitals (N= 212).	Was applied on subordinates the abusive supervision 15-items scale from Tepper's (2000).	Abusive supervision was positively correlated to toxic emotions at work and counterproductive work behavior, also, was found positively correlated with organizational citizenship behavior.	Other factors as is job satisfaction was not control, and may be are related with the variables. Also, the data was collected in Taiwan.
24	Courtright et al. (2016)	2016	Definition of abusive supervision from Tepper's (2000) was used.	Resource drain theory.	Study 1, the positive relation between family-to-work conflict and abusive supervision. Study 2, as well the positive relation between family-to-work conflict, and abusive supervision via ego depletion.	Two studies in USA. Study 1, a longitudinal study (T1 and T2, three months apart, and, T3 one week after T2). Investigate on groups if family-to-work conflict is related to abusive supervision. Study 2, a daily study (two week work period, in total 10 consecutive days). Investigate on supervisors', as well, if family-to-work conflict (FWC) is related to abusive supervision.	Study 1, groups of supervisor and subordinates from a financial services company (N= 134 supervisors, and N= 580 subordinates). Study 2, supervisors' in multiple industries (N= 92).	Study 1, was applied on subordinates the abusive supervision active-aggressive 5-items from Mitchell and Ambrose 10-items scale(2007). Study 2, also, was applied the abusive supervision active-aggressive 5-items from Mitchell and Ambrose 10-items scale (2007), but only on supervisors'.	Study 1, was found positively related FWC to abusive supervision, as well, was found the relationship was more stronger for female supervisors' than for male. Study 2, was found, also, positively related FWC to abusive supervision, and, significant relation between daily ego depletion and daily abusive supervision.	Study 1, the research found the FWC can vary on day-to-day basis, and the variable job autonomy was distal from supervisor situation of control. Study 2, the data were collected from same source, same survey and at the same daily time. Also, the variety of positions and industries from participants did not allow moderating effects test.
25	Decoster et al. (2013)	2013	Definition of abusive supervision from Tepper's (2000) was used.	Social exchange theory, social identity theory, and social-categorization theory.	The relation between abusive supervision and outcomes.	One cross-sectional study in Belgium. Investigate on dyads the subordinates perception of abusive supervision.	Dyads of supervisor and subordinate from diverse organizations (N= 134).	Was applied on subordinates the abusive supervision 15-items scale from Tepper's (2000).	Abusive supervision was found negatively related to perceived cohesion, and, significant to organizational identification. Also, was found no negative significant the relation between abusive supervision and tendency to gossip.	Supervisor rated one variable (tendency to gossip), and employees other variable (cohesion), also, abusive supervision reported low levels. As well, the cross-sectional design does not allow to make causal inference.
26	Eissa and Lester (2017)	2017	Definition of abusive supervision from Tepper's (2000) was used.	Affective events theory.	Neuroticism moderated the relation between role overload and frustration; conscientiousness and agreeableness moderated the positive relation between frustration and abusive supervision.	One cross-sectional study in USA. Investigate on dyads the subordinates perception of abusive supervision.	Dyads of supervisor and subordinate from diverse organizations (N= 190).	Was applied on subordinates the abusive supervision active-aggressive 5-items from Mitchell and Ambrose 10-items scale (2007).	Was found positively associated supervisor frustration with abusive supervision, also, was found supervisor role overload had a indirect effect on abusive supervision via supervisor frustration.	The cross-sectional design does not allow to make causal inference. Also, the theoretical framework used not eliminated the fact of another possibilities for the hypothesis.
27	Eschleman et al. (2014)	2014	Definition of abusive supervision from Tepper's (2000) was used.	Expectancy theory.	Perceived intent moderated the positive relation between abusive supervision and counterproductive work behaviors (CWB).	One longitudinal study in USA (T1 and T2, one month apart). Investigate subordinates counterproductive responses to abusive supervision.	Employed from StudyResponse database (N= 268).	Was applied on subordinates the abusive supervision active-aggressive 5-items from Mitchell and Ambrose 10-items scale (2007).	Abusive supervision was found positively related to CWB directed at the organization, and, CWB directed at the supervisor. As well, motivational intent moderate the relation between abusive supervision and CWB.	The data was collected by self-reported, this made the data vulnerable of common method variance, also, the variables were not assessed multiple times.
28	Fan et al. (2020)	2020	Definition of abusive supervision from Tepper's (2000) was used.	Conservation of resources theory.	Emotional exhaustion mediated the negative relation between team performance and abusive supervision, this relation is moderated by regulatory focus.	One longitudinal study in China (T1, T2 and T3, time lag not mentioned). Investigate on teams the subordinates perception of abusive supervision.	Teams of supervisor and two subordinates from a hypermarket chain (N= 130).	Was applied on subordinates only the active-aggressive 5-items from Mitchell and Ambrose 10-items scale (2007).	Was found emotional exhaustion mediated the negative effects of team performance on abusive supervision, and regulatory focus moderated team performance on abusive supervision via emotional exhaustion.	The design was time-lagged but still was not possible establish the causality, also the sample size lacked the statistical power.
29	Ferris et al. (2016)	2016	Definition of abusive supervision from Tepper's (2000) was used.	Approach/avoidance framework.	Anger and anxiety mediates the positive relation between abusive supervision and outcomes.	Two longitudinal studies in China. Study 1 (T1, T2 and T3, four months apart). Investigate on subordinates workplace aggression as abusive supervision. Study 2 did not measured abusive supervision.	Employed from five different companies (N= 257).	Was applied on subordinates only 13-items from the 15-items scale from Tepper's (2000).	Abusive supervision was found positively related to anger, and not significantly relate to anxiety.	The data was collected from the same source, also, the design was cross-sectional.
30	Garcia et al. (2014)	2014	Definition of abusive supervision from Tepper's (2000) was used.	Social learning theory.	On the four studies, angry rumination moderated the positive relation supervisors’ history of family aggression and abusive supervision via hostile cognitions, and hostile affect.	Four studies in the Philippines. Studies 1 and 2, a cross-sectional studies. Investigate on dyads only subordinates perception of abusive supervision. Study 3, a longitudinal study (T1 and T2, 3 months apart). Investigate on triads only subordinates perception of abusive supervision. Study 4, a longitudinal study (T1 and T2, two weeks apart, and T3, six months after T2). Investigate on dyads only…	Study 1, dyads of supervisor and subordinate from MBA part-time students who worked in multiples companies (N= 154). Study 2, dyads of supervisor and subordinate from a call center (N=199). Study 3, triads of parents, supervisor and subordinate from four customer organizations, two call centers and two retail organizations (N= 134). Study 4, dyads of supervisor and subordinate from postgraduate s…	Was applied on the four studies on subordinates only the 15-items scale from Tepper's (2000).	Study 1, was found positively correlated hostile cognitions and hostile affect with abusive supervision. Studies 2, 3 and 4, was found not significant the indirect effect between supervisors’ history of family aggression and abusive supervision via hostile cognitions for angry rumination, but was found significant and stronger via hostile affect for high angry rumination.	Was not include the variable of arousal, also two studies were cross-sectional. As well, two variables (history of family aggression and hostile affect) participants answered over past situations, them may not accurately remember.
31	Garcia et al. (2015)	2015	Definition of abusive supervision from Tepper's (2000) was used.	General aggression model.	Neuroticism moderated the relation between abusive supervision and workplace deviance.	One longitudinal study in the Philippines (T1 and T2, eighteen months apart). Investigate on subordinates their perception of abusive supervision, and the relationship with workplace deviance.	Employed from a public sector (N= 156).	Was applied on subordinates the abusive supervision active-aggressive 5-items from Mitchell and Ambrose 10-items scale(2007).	Abusive supervision was found positively related to workplace deviance.	A temporal separation were used but was not sufficient for cause and effect relation. Also, the study was only focused on neuroticism not include other facets.
32	Gonzalez-Morales et al. (2018)	2018	Definition of abusive supervision from Tepper's (2000) was used.	Organizational support theory.	Relation between supervisor support and abusive supervision.	One quasiexperimental study in USA (T1 and T2, nine months apart). Investigate on teams, the subordinates perception of abusive supervision.	Employed from eight restaurants (N= 23 supervisors', and N=208 experimental employees).	Was applied six items from the scale of Negative Acts Questionnaire–Revised (NAQ-R) (Einarsen et al., 2009).	Was found a significant interaction effect on employees’ perceptions of perceived supervisor support and abusive supervision, as well, employees whose supervisors received support training reported less abusive supervision.	The participants were unable to identify, and assess the individual scores, also, the scores of abusive supervision were low.
33	Gregory et al. (2013)	2013	Definition of abusive supervision from Tepper et al. (2008) was used.	Social exchange theory, organizational justice and fairness theory.	Satisfaction with pay moderated the negative relation between abusive supervision and subordinate’s OCBs.	One cross-sectional study in Kazakhstan. Investigate on subordinates their perception of abusive supervision and organizational citizenship behaviors (OCB).	Employed from seven different banks (N= 357).	Was applied on subordinates the abusive supervision 15-items scale from Tepper's (2000).	Abusive supervision was found negatively related to subordinate’s willingness to perform OCB, also, abusive supervision and OCB was negative and significant with low levels of satisfaction with pay.	The design was cross-sectional, also were investigated with only two moderators. As well, the research did not control outside work factors.
34	Guan and Hsu (2020)	2020	Definition of abusive supervision from Tepper's (2000) was used.	Deterrence theory.	Affective commitment, normative commitment and continuance commitment mediates the relation between abusive supervision and information security policy (ISP) noncompliance intention, the relation is moderated by perceived certainty and severity of sanctions.	One cross-sectional study in China. Investigate on subordinates their perception of abusive supervision.	Employed from various organizations (N= 199).	Was applied on subordinates the 15-items scale from Tepper's (2000).	Was found AS significantly and negatively influenced affective commitment, normative commitment and continuance commitment.	The sample was collected from different industries and were only from China.
35	Guo et al. (2018)	2018	Definition of abusive supervision from Tepper's (2000) was used.	Transactional theory of stress.	Both studies proposed psychological capital moderated the positive and negative relation between authoritarian leadership and outcomes.	Two studies. Study 1, cross-sectional study in Lagos-Nigeria. Investigate on dyads the subordinates perception of authoritarian leadership using abusive supervision as control variable. Study 2, longitudinal study in China (T1, T2 and T3, two weeks apart). Investigate the same of study 1.	Study 1, was dyads of supervisor and subordinate from different organizations (N= 115). Study 2, was dyads of supervisor and subordinate from different organizations (N= 192).	Both studies applied on subordinates the abusive supervision active-aggressive 5-items from Mitchell and Ambrose 10-items scale (2007).	On both studies employee PsyCap was moderated the relation between authoritarian leadership and employee fear. These moderated mediation were strongly supported controlling abusive supervision.	One of the studies was a cross-sectional design, also the samples were from two countries with high tolerance for authoritarian leaders.
36	Guo et al. (2020)	2020	Definition of abusive supervision from Tepper's (2000) was used.	Social exchange theory.	Proactive personality moderated the relation between abusive supervision and unethical pro-organizational behavior (UPB).	One longitudinal study in China (T1 and T2, two months apart). Investigate on subordinates their perception of abusive supervision.	Employed from multiple companies (N= 353).	Was applied on subordinates the active-aggressive 5-items from Mitchell and Ambrose 10-items scale (2007).	Was found AS negatively influenced UPB when proactive personality was low.	Was not ensure the causal relation between variables, and was examined only one moderating variable.
37	Haggard and Park (2018)	2018	Definition of abusive supervision from Tepper's (2000) was used.	Empathetic concern theory, attribution theory, justice theory and trust repair theories.	Study 1, LMX moderated the relation between abusive supervision and outcomes, perceived supervisor remorse mediated the relation. Study 2, interactional justice and LMX moderated the relation between abusive supervision and outcomes, perceived supervisor remorse mediated the relation.	Two longitudinal studies in USA. Study 1 (T1 and T2, three weeks apart). Investigate on subordinates their perception of abusive supervision. Study 2 (T1, T2, and T3 three weeks apart). Investigate the same of study 1.	Study 1, employed from different organizations using panelists from SurveyMonkey (N= 473). Study 2, employed from different organizations using Research Match (N= 253).	Both studies applied on subordinates the abusive supervision 15-items scale from Tepper's (2000).	Study 1, abusive supervision was found negatively related to LMX and organization‐based self‐esteem, and positively related to turnover intentions, constructive and dysfunctional resistance. Study 2, abusive supervision was found negatively related to perceived supervisor remorse, interactional justice, LMX and organization‐based self‐esteem, and positively related to turnover intentions, constru…	Study 1, was used self-reported data, and the model did not test the interactional justice. Study 2, the use of online panel sample.
38	Harris et al. (2011)	2011	Definition of abusive supervision from Tepper's (2000) was used.	Displaced aggression, conflict, and LMX theory.	On both studies LMX quality moderated the relation between supervisors coworker conflict and abusive supervision, as well, abusive supervision mediates the relation between supervisors coworker conflict and outcomes.	Two cross-sectional studies in USA. On both studies, was investigated on dyads the subordinates perception of abusive supervision.	Study 1, dyads of supervisor and subordinate from a state government responsible for disease issues (N= 121). Study 2, dyads of supervisor and subordinate from a state government responsible for environmental health issues (N= 134).	On both samples, was applied on subordinates only 6-items from the 15-items scale from Tepper's (2000).	On both studies. Supervisor reports of coworker conflict was found positively, and significantly related to abusive supervision, but LMX was found negatively related with abusive supervision. The interaction between supervisor reports of coworker conflict and LMX was negatively and significantly related to abusive supervision. Also, abusive supervision fully mediated the relation between supervis…	The theories used are not the only theories to explained the hypothesis, also was unable measure the causality. As well, the sample was only employees in white-collar positions.
39	Harris et al. (2013)	2013	Definition of abusive supervision from Tepper's (2000) was used.	Conservation of resources theory and transactional model of stress and coping.	Positive and negative relation between abusive supervision and immediate and distal outcomes.	One cross-sectional study in USA. Investigate on subordinates their perception of abusive supervision.	Employed from different companies (N= 225).	Was applied on subordinates only 6-items from the 15-items scale from Tepper's (2000).	Abusive supervision was found positively related to job strain, frustration, and negatively related to job satisfaction. As well, was found not significantly related to turnover intentions.	The variables were measured at the same time, on same participants. Also, the data was collected by students. And, on cross-sectional design.
40	Harvey and Harris (2010)	2010	None.	Affective events theory.	Relation between psychological entitlement and political behavior and co-worker abuse. Mediated by job-related frustration, and moderating by supervisor communication.	One cross-sectional study in USA. Investigate on subordinates their perception of co-worker abuse.	Employed from different companies (N= 223).	Was applied on subordinates only 6-items from the 15-items scale from Tepper's (2000), adapted for coworkers abuse.	Psychological entitlement, job-related frustration, and abusive co-worker behavior was found simultaneously significant.	The study design (cross-sectional) limits causality; also for the nature of this study, participants required divulge peer sensitive information.
41	Harvey et al. (2014)	2014	Definition of abusive supervision from Tepper's (2000) was used.	None.	For both studies, abusive supervision mediate the positive relation between psychological entitlement and outcomes.	Two cross-sectional studies in USA. Study 1, investigate on subordinates their perception of abusive supervision. Study 2, investigated on dyads co-worker and subordinate both perceptions of abusive supervision.	Study 1, employed from different companies (N= 396). Study 2, dyads of co-worker and subordinate from different companies (N= 81).	On both samples was applied only 6-items from the 15-items scale from Tepper's (2000).	Study 1, psychological entitlement was found significant related to perceptions of abusive supervision, as well abusive supervision was found significant positive related to upward undermining behaviors. Study 2, same of study 1, abusive supervision was found significant positive related to upward undermining behaviors, and abusive supervision was found associated with co-workers organizational d…	On study 1, the self-report data. Both studies, had a cross-sectional design, a limitation for causality. And, was found psychological entitlement appears to influence ratings of abusive supervision.
42	Henle and Gross (2014)	2014	Definition of abusive supervision from Tepper's (2000) was used.	Victim precipitation theory.	Negative emotions at work mediated the negative relation between outcomes and abusive supervision.	One cross-sectional study in USA. Investigate on subordinates their perception of abusive supervision.	Undergraduate business courses students from university (N= 222).	Was applied on subordinates the abusive supervision 15-items scale from Tepper's (2000).	Emotional stability and conscientiousness was found significantly, and inversely related to abusive supervision; but agreeableness was unrelated, and was found an indirect effect of personality on abusive supervision via negative emotions.	The cross-sectional study was a limitation for causality; also, the self-reports might increase common method variance.
43	Hon and Lu (2016)	2016	Definition of abusive supervision from Tepper's (2000) was used.	Cognitive social learning theory and trickle-down model.	Traditionality and power distance moderated the positive and negative relations between abusive supervision, abusive subordinate behavior and service performance.	One cross-sectional study in China. Investigate on teams only the subordinates perception of abusive supervision.	Teams of supervisor and subordinates from different hotels (N= 266 subordinates, and N= 36 supervisors).	Was applied on subordinates the abusive supervision 15-items scale from Tepper's (2000).	Abusive supervision was found positively correlated with subordinates’ abusive behavior, and negatively related to employee service performance.	The data comes from the same source that possibility common method variance; also, was not examined the mechanism of social learning process. As well, the sample was from a single country.
44	Hoobler and Hu (2013)	2013	Definition of abusive supervision from Tepper's (2000) was used.	Organizational justice	Supervisors' negative affect and abusive supervision mediated the relationship between supervisors' interactional justice perceptions and outcomes.	One cross-sectional study in USA. Investigate on dyads the subordinates perception of abusive supervision.	Dyads of supervisor, subordinate and one family member of the subordinate, from MBS students who works on different companies (N= 200).	Was applied on subordinates only the 15-items scale from Tepper's (2000).	Abusive supervision was found significantly related to supervisor–subordinate tenure relation and to subordinates' negative affect; as well, was found a negative association between supervisor interactional justice perceptions and supervisor negative affect, and positive association between supervisor negative affect and abusive supervision.	The cross-sectional design could not specify causality, and a single measured cannot differentiate aspects of affect.
45	Huang et al. (2019)	2019	Definition of abusive supervision from Tepper's (2000) was used.	Job demands–resources (JD-R) model.	Daily work engagement mediated the positive and negative relation between abusive supervision and outcomes.	One daily study in Taiwan (10 consecutives working days). Investigate on subordinates their perception of abusive supervision.	Employed from high-tech company (N= 60).	Was applied on subordinates the 15-items scale from Tepper's (2000).	Was found daily work engagement fully mediates the negative relation between abusive supervision, organizational citizenship behavior and voice.	Was only considered one style of leadership; also, the data were collected only from one level of employees with self-report measures.
46	Hurst et al. (2019)	2019	Definition of abusive supervision from Tepper's (2000) was used.	Theory of purposeful work behavior and multimotive model of interpersonal threat.	Abusive supervision moderated the relation between primary psychopathy and outcomes.	One longitudinal study with two samples in USA (T1 and T2, one month apart). Investigate on subordinates their perception of abusive supervision linked with psychopathy.	Employed from different companies recruited from a national survey panel (combined the participants from both samples N= 368).	Was applied on subordinates the 15-items scale from Tepper's (2000).	Was found a significant effect of the relation between primary psychopathy and abusive supervision on positive affect; as well, was found significant abusive supervision on the relationship between primary psychopathy and anger; and, a significant moderating effect of abusive supervision on primary psychopathy and engagement.	The variables were measured with self-reported; also, were a lack of behavioral-dependent variables.
47	Jha (2019)	2019	Definition of abusive supervision from Tepper's (2000) was used to define abusive leadership.	Social exchange theory.	Psychological empowerment mediated the relation between psychological safety (PS) and employee retention (ER), and abusive leadership moderated the relation.	One cross-sectional study in India. Investigate on supervisors their perception of managers abusive leadership.	Managers and/or supervisor from telecom industry (N= 337).	Was applied the abusive supervision active-aggressive 5-items from Mitchell and Ambrose 10-items scale (2007) to measure abusive leadership.	The relation between PS and abusive leadership on ER was found significant.	Some variables was used only has control (age and education). Also, the study was cross-sectional, the data of ER can capture more insights in longitudinal measure.
48	Jian et al. (2012)	2012	Definition of abusive supervision from Tepper's (2000) was used.	Self-consistency theory.	Organization-based self-esteem (OBSE) mediated the negative relation between abusive supervision and service performance; and, was moderated by relational-interdependent self-construal.	One longitudinal study in China (T1 and T2 eight months apart). Investigate on dyads the subordinates perception of abusive supervision.	Dyads of supervisor and subordinate from five hotels (N= 324).	Was applied on subordinates only the 15-items scale from Tepper's (2000).	Abusive supervision was found negatively correlated with OBSE and service performance; as well, when OBSE mediated the relation between abusive supervision and service performance was became non-significant. And, abusive supervision was found more negatively related to OBSE when RISC is high than low.	The data from two variables comes from the same source; also, the time interval was eight months and this design may have allowed factor to influence the variables. As well, the sample was from private companies.
49	Jiang et al. (2019)	2019	Definition of abusive supervision from Tepper's (2000) was used.	Social cognitive theory and social comparison theory.	Creative self-efficacy was mediated the negative relation between own abusive supervision and employee creativity. And, peer abusive supervision and social comparison was moderated the relation.	One longitudinal study in China (T1 and T2 six months apart). Investigate on teams, only the subordinates perception of own and peer abusive supervision.	Teams of supervisor and subordinates from different pharmacy chain (N= 253 employees, and N= 77 supervisors).	Was applied on subordinates and peers the abusive supervision active-aggressive 5-items from Mitchell and Ambrose 10-items scale(2007).	Abusive supervision and peer abusive supervision was found negatively related to creative self-efficacy and employee creativity.	The sample was just from one industry in China; also, was missing objectives measures.
50	Ju et al. (2019)	2019	Definition of abusive supervision from Tepper's (2000) was used.	Self-perception theory and power dependence theory.	For all the studies, chronic sense of power moderates the relationship between abusive supervisory behavior and outcomes.	Four studies. One daily and three experiments in China, United States and Canada. Study 1, a daily study (one day, and after one week, 10 consecutive working days). Study 2a, a experimental study in China. Study 2b and 3, a experimental studies in United States and Canada. The four studies investigate on supervisors the own perception of abusive supervisory behavior.	Study 1, supervisors from various industries and organizations (N= 72). Study 2a, supervisors from Sojump.com online platform (N= 102). Study 2b, supervisors from Mechanical Turk data-collection (N= 194). Study 3, supervisors from United States Mturk (N= 282).	Study 1, was applied on supervisor 5-items from the abusive supervision 15-items scale from Tepper's (2000). Study 2a, 2b and 3, was applied on supervisor the abusive supervision active-aggressive 5-items from Mitchell and Ambrose 10-items scale (2007).	Study 1, was found daily abusive supervisory behavior positively predicted daily state sense of power; also, was found significant indirect effects between abusive supervisory behavior on daily managerial self-efficacy via daily state sense of power. Study 2a, was found abusive supervisory behavior positively related to supervisor state sense of power, higher levels on experimental condition comp…	The measures self-reported can lead to common method variance; also, abusive supervisory behavior was found predictor of supervisors’ state sense of power.
51	Karagonlar and Neves (2020)	2020	Definition of abusive supervision from Tepper's (2000) was used.	The relational model of workplace victimization.	On both studies, abusive supervision mediated the relation between the subordinate and supervisor social value orientations (SVO) and subordinate’s in-role performance.	Two studies. Study 1, a cross-sectional study in Portugal. Investigate on dyads the subordinates perception of abusive supervision. Study 2, a experimental laboratory study in Portugal. Investigate on supervisor the own perception of abusive supervision.	Study 1, dyads of supervisor and subordinate from 42 organizations (N=115 supervisors and N= 420 subordinates). Study 2, students from a business school (N= 78).	Study 1, applied on subordinates only the 15-items scale from Tepper's (2000). Study 2, AS were assessed with four questions (scale reference not mentioned).	Was found negatively related subordinate SVO to AS, also was found negatively related AS to in-role performance. Study 2, was found more positively the abusive treatment in females , and more positively the abusive treatment when employees had low concern for the organization.	The study 1, was cross-sectional and preclude strong causal claims.
52	Khan and Medica (2020)	2020	Definition of abusive supervision from Tepper's (2000) was used.	Conservation of resources theory.	Emotional exhaustion mediated the relation between intimidation and abusive supervision, this relation is moderated by recognition.	One cross-sectional study in Pakistan. Investigate on subordinates their perception of abusive supervision.	Employed from a telecommunications company (N= 443).	Was applied on subordinates the 15-items scale from Tepper's (2000).	Was found significantly related intimidation and emotional exhaustion to AS, and emotional exhaustion partially mediated the relation.	The cross-sectional data collected only one time and was self-rated.
53	Khan et al. (2017)	2017	Definition of abusive supervision from Tepper's (2000) was used.	Victim precipitation theory and the dual-process model (DPM).	Subordinates 'authoritarian submission mediated the positive relation between subordinates’ dangerous worldviews about their organization, and subordinates’ perceptions of abusive supervision, this relation was moderated by their supervisors’ evaluations of job performance.	One cross-sectional study in Pakistan. Investigate on dyads the subordinates perception of abusive supervision.	Dyads of supervisor and subordinate from 15 different organizations (N=173 employees, and N= 45 supervisors).	Was applied on subordinates only the 15-items scale from Tepper's (2000).	Was found positively correlated subordinates’ authoritarian submission with perceived abusive supervision, and performance negatively correlated with perceptions of abusive supervision.	The cross-sectional design could not specify causality; also, the research explore a new context on the country sample. As well, the abuse was measured only on subordinates and not on the own supervisors.
54	Khan et al. (2018)	2018	Definition of abusive supervision from Tepper's (2000) was used.	Social dominance theory.	Perceived threat to hierarchy mediated the negative relation between supervisor evaluation of subordinate performance and subordinate perception of abusive supervision, the relation is moderated by supervisor social dominance orientation (SDO).	One cross-sectional study in Pakistan. Investigate on dyads the subordinates perception of abusive supervision.	Dyads of supervisor and subordinate from 27 different organizations (N=160 employees, and N= 45 supervisors).	Was applied on subordinates only the 15-items scale from Tepper's (2000).	Was found a negative relation between subordinate performance and abusive supervision; also, was found when supervisor SDO is high, the subordinate performance indirect effect on abusive supervision through threat to hierarchy was significant.	Not existing a previous measure for the variable of threat to hierarchy; also, the cross-sectional design could not specify causality. As well, the abusive supervision was measured only on subordinates and not on the own supervisors.
55	Khan et al. (2020)	2020	Definition of abusive supervision from Tepper's (2000) was used.	Theory of purposeful work behavior.	Work engagement and negative socioemotional behavior (NSEB) mediated the negative relation between psychopathy and creativity, abusive supervision moderates the relation.	One longitudinal Study in China (T1 and T2, three months apart). Investigate on dyads the subordinates perception of abusive supervision.	Dyads of supervisor and subordinate from public hospitals (N= 267).	Was applied on subordinates only the active-aggressive 5-items from Mitchell and Ambrose 10-items scale (2007).	Was found a negative relation between psychopathy and employee creativity, also was found a positive relation between psychopathy and NSEB when AS was high.	The sample was small, and was only from one country.
56	Kiazad et al. (2010)	2010	Definition of abusive supervision from Tepper's (2000) was used.	Theory of individual differences in task and contextual performance, and the general aggression model (GAM).	Study 1, subordinate perceptions of authoritarian leadership mediated the positive relation between supervisor Machiavellianism and abusive supervision. Study 2, same model of study 1; and, as well, organization-based self-esteem (OBSE) moderated the positive relation between authoritarian leadership and abusive supervision.	Two studies. Study 1, cross-sectional study in Australia, investigate on dyads the subordinates perception of abusive supervision. Study 2, a longitudinal study in Philippines (T1 and T2, three months apart), investigate the same of Study 1.	Study 1, dyads of supervisor and subordinate from different companies (N= 92). Study 2, dyads of supervisor and subordinate from two financial companies (N= 200).	Both studies applied on subordinates only the 15-items scale from Tepper's (2000).	Study 1, was found significant the relation between authoritarian leadership behaviors and subordinate perceptions of abusive supervision. Study 2, was found supervisors’ Machiavellianism positively related to subordinate perceptions of abusive supervision; also, was found stronger positive relation between authoritarian leadership behavior and subordinate perceptions of abusive supervision for e…	The results of the studies differ and was unclear why; also, the measures were self-reported surveys.
57	Kiewitz et al. (2012)	2012	Definition of abusive supervision from Tepper's (2000) was used.	Social learning theory.	Both studies, self-control moderated the positive relation between supervisors' previous experience of family undermining and subordinate perceptions of abusive supervision.	Two cross-sectional studies in the Philippines. Study 1, investigate on dyads only the subordinates perception of abusive supervision. Study 2, investigate on triads only the subordinates perception of abusive supervision.	Study 1, dyads of supervisor and subordinate from retail company (N= 179). Study 2, triads of supervisor, subordinate and sibling (N= 97).	In both studies, was applied on subordinates only the 15-items scale from Tepper's (2000).	Study 1, was found a significant amount of variance between supervisors' previous experience of family undermining explained and subordinates' perceptions of abusive supervision; also, in low levels of self-control was found a positive and significant relation between supervisors' previous experience of family undermining and subordinates' perceptions of abusive supervision, whereas at high level…	The research related, to intergenerational transmission of violence need to be exercised with caution.
58	Kim et al. (2015)	2015	Definition of abusive supervision from Tepper's (2000) was used.	Social exchange theory.	Organizational and coworker support moderated the negative relation between abusive supervision and knowledge sharing.	One cross-sectional study in South Korea. Investigate on dyads the subordinates perception of abusive supervision.	Dyads of supervisor and subordinate from manufacturing, finance, and service companies (N= 128).	Was applied on subordinates only the 15-items scale from Tepper's (2000).	Was found a significant negative relationship between abusive supervision and knowledge sharing; also, was found a significant interaction between abusive supervision and organizational support, but not significant with coworker support.	The cross-sectional design cannot infer for causality, also the sample was mostly male with high education level. As well, the number of variables on the research was limited.
59	Kim et al. (2019)	2019	Definition of abusive supervision from Tepper's (2000) was used.	LMX theory.	Injury initiation, performance pressure and personal disposition (attributed motives) moderated the negative relation between abusive supervision, LMX and outcomes.	One cross-sectional qualitative interviews in USA. Investigate on subordinates their perception of abusive supervision.	Employed from different companies (N= 139).	Was applied on subordinates the 15-items scale from Tepper's (2000).	Was found significantly and negatively correlated abusive supervision with LMX, and this relation was moderated by attributed motives.	The data were collected on retrospective from the abuse victim; also, was not collected from the supervisor.
60	Kim et al. (2018)	2018	Definition of abusive supervision from Tepper's (2000) was used.	Social exchange theory and conservation of resources theory.	For both studies, organizational tenure moderated the negative relation between abusive supervision and knowledge sharing.	Two cross-sectional studies in South Korea. Both studies, investigate on dyads the subordinates perception of abusive supervision.	Study 1, dyads of supervisor and subordinate from different manufacturing companies (N= 150). Study 2, dyads of supervisor and subordinate from armed forces (N= 217).	Study 1, was applied on subordinates only the 15-items scale from Tepper's (2000). Study 2, was applied on subordinates only the abusive supervision active-aggressive 5-items from Mitchell and Ambrose 10-items scale(2007).	On both studies was found significantly related abusive supervision and knowledge sharing; as well, was found organizational tenure moderated effect between abusive supervision and knowledge sharing.	The cross-sectional design cannot infer for causality, and some factor was not included on the model.
61	Klotz and Bolino (2016)	2016	None.	Social exchange theory.	The positive and negative relation between abusive supervision and resignation style.	Four cross-sectional studies in USA. Studies 1, 2 and 4 did not measure abusive supervision. Study 3, investigate subordinates perception of abusive supervision.	Employed from different companies through Survey Monkey/Zoomerang (N= 240).	Was applied on past tense to subordinates the 15-items scale from Tepper's (2000).	Was found significantly related abusive supervision and resignation styles.	The study collected the data from a single source at only one time.
62	Kluemper et al. (2019)	2019	Definitions of abusive supervision from Tepper's (2007) was used.	Victim precipitation theory.	Study 1, abusive supervision mediated the relation between core self-evaluation and employee deviance. Studies 2 and 3, the same mechanisms, additionally the relation between abusive supervision and employee deviance is moderated by cognitive ability.	Three studies in USA and Romania. Study 1, cross-sectional study in USA. Investigate on dyads the subordinates and coworker both perception of abusive supervision. Study 2, longitudinal (T1, T2, T3 and T4, two weeks apart) study in USA. Investigate on dyads the subordinates perception of abusive supervision. Study 3, a longitudinal study (T1 and T2, two weeks apart) in Romania. Investigate on dya…	Study 1, dyads of subordinates and coworker from different companies (N= 121). Study 2, dyads of supervisor and subordinate employed in a variety of companies (N= 163). Study 3, dyads of supervisor and subordinate from different companies (N= 281).	On all the studies was applied on subordinates only the 15-items scale from Tepper's (2000).	Study 1, was found significantly correlated abusive supervisor with core self-evaluation and employee deviance. Study 2, was found a stronger relation between abusive supervision and deviance when cognitive ability is low. Study 3, was found cognitive ability significant moderated the deviance from abusive supervision.	The findings may have affected by supervisors deviance ratings; also, one moderation mediation hypothesis was not supported.
63	Lam and Xu (2019)	2019	Definition of abusive supervision from Tepper's (2000) was used.	Trait activation theory.	Power distance orientation moderates the relation between abusive supervision and defensive silence; as well, abusive supervision moderates the relation between power distance orientation and acquiescent silence.	One longitudinal study in China (T1 and T2, six weeks apart). Investigate on subordinates their perception of abusive supervision.	Employed from different alumni associations (N= 159).	Was applied on subordinates the abusive supervision active-aggressive 5-items from Mitchell and Ambrose 10-items scale(2007).	Was found a positively associated between abusive supervision and defensive silence; also, was found only on high levels of abusive supervision a positive and significant relation between power distance orientation and acquiescent silence.	The sample were collected from junior employees only; also, the correlation between demographic variables an two types of silence was not significant.
64	Lam et al. (2017)	2017	Definition of abusive supervision from Tepper's (2000) was used.	Conservation of resources theory.	The positive relation between supervisors' emotional exhaustion and abusive supervision is moderated by perceived subordinate performance and supervisor self‐monitoring.	Two longitudinal studies in China. Both studies (T1 and T2, one month apart). Investigate on dyads the subordinates perception of abusive supervision.	Study 1, dyads of supervisor and subordinate from telecommunications manufacturing company (N= 219 subordinates, and N= 44 supervisors). Study 2, dyads of supervisor and subordinate from a call center (N= 416 subordinates, and N= 50 supervisors).	On both studies was applied only on subordinates only the 15-items scale from Tepper's (2000).	On both studies was found a positive relation between supervisors' exhaustion and abusive supervision, but only when perceived subordinate performance and supervisor self‐monitoring were low.	Some variables were measured at different time; also, one of the studies used a small sample. As well, all the samples was from the same country.
65	Lee et al. (2013)	2013	Definition of abusive supervision from Tepper's (2000) was used.	Activation theory.	The curvilinear relation between abusive supervision and employee creativity.	One cross-sectional study in South Korea. Investigate on dyads the subordinates perception of abusive supervision.	Dyads of supervisor and subordinate from government-affiliated organization (N= 203).	Was applied on subordinates only the 15-items scale from Tepper's (2000).	Was found a inverted U-shaped on the relation between abusive supervision and employee creativity.	The cross-sectional design cannot infer for causality, and the data were collected from one organization in one country.
66	Lee et al. (2018)	2018	Definition of abusive supervision from Tepper's (2000) was used.	Conservation of resources theory.	Emotional exhaustion mediated the negative relation between abusive supervision and knowledge sharing, and was moderated by organizational justice.	One cross-sectional study in South Korea. Investigate on dyads the subordinates perception of abusive supervision.	Dyads of supervisor and subordinate from government-affiliated organization (N= 202).	Was applied on subordinates only the 15-items scale from Tepper's (2000).	Was found a negative relation between abusive supervision and knowledge sharing; and, emotional exhaustion was found significant reducing the effect of abusive supervision on knowledge sharing; also, was found the indirect effect of abusive supervision significant and stronger on low levels of distributive justice but not in high levels.	The cross-sectional design cannot infer for causality; also, three variables was measured from same source (subordinate), and the data were from just one organization with administrative positions.
67	Li et al. (2016)	2016	Definition of abusive supervision from Tepper's (2000) was used.	None.	Employees’ perceived organizational support and political skill moderated the positive relation between abusive supervision and burnout.	One cross-sectional study in China. Investigate on teams the subordinates perception of abusive supervision.	Teams of supervisor and subordinates from a hotel (N= 248 subordinates, and N= 57 supervisors).	Was applied on subordinates only the 15-items scale from Tepper's (2000).	Was found positively and significantly correlated abusive supervision and burnout, and this interaction was found positively associated with low organization support, and not significant with high organizational support. Also, the interaction was found positively and significantly associated with low political skill and non-significant for high political skill.	The cross-sectional design cannot infer for causality; also, the sample were from one industry. As well, abusive supervision were measured on individual subordinates perception not at group level.
68	Li et al. (2021)	2021	Definition of abusive supervision from Tepper's (2000) was used.	Social control perspective.	Study 1 and 2, substitute mechanisms effect from authoritarian leadership and abusive supervision over affiliative and proactivity behaviors. Study 3, same mechanisms of studies 1 and 2; also, perceived powerlessness and intrinsic motivation mediated the relation between abusive supervision and affiliative-proactivity behaviors.	Three studies in China. Study 1, a cross-sectional study. Investigate on dyads the subordinates perception of abusive supervision. Study 2, a longitudinal study (T1 and T2, 3 months apart). Investigate the same of study 1. Study 3, a longitudinal (T1 and T2, 2 months apart). Investigate the same of study 1 and 2.	Study 1, dyads of supervisor and subordinate from telecom company (N=163). Study 2, dyads of supervisor and subordinate from two pharmaceutical companies (N= 206). Study 3, dyads of supervisor and subordinate from part-time MBA students who work in different companies (N= 136).	Study 1, was applied on subordinates the abusive supervision active-aggressive 5-items from Mitchell and Ambrose 10-items scale (2007). Study 2 and 3, was applied on subordinates the abusive supervision 10-items scale from Aryee et al. (2007).	Study 1, was found a positive significant relation between abusive supervision and authoritarian leadership predicting proactive behavior, and not significantly with affiliative behavior. Study 2, was found a positive relation between abusive supervision and proactive behavior; also, positive relation with affiliative behavior. Study 3, was found a significant and negatively relation between abus…	All the studies were used surveys to measured all the variables; also, all the participants were from China.
69	Li et al. (2020)	2020	Definition of abusive supervision from Tepper's (2000) was used.	Conservation of resources theory.	Ego depletion mediated the positive relation between challenge and hindrance stressors and abusive supervision behavior, emotional intelligence moderated the relation.	One longitudinal study in (country not mentioned) (T1, T2 and T3, with two or three days apart). Investigate on dyads the subordinates perception of abusive supervision.	Dyads of supervisor and subordinate from multi organizations (N= 228).	Was applied on subordinates only the active-aggressive 5-items from Mitchell and Ambrose 10-items scale (2007).	Was found a positive relationship between ego depletion and AS, also is significant the indirect effect of challenge stressors on AS behavior through ego depletion.	Was not controlled other factors that could influence the variables supervisors’ stressors, ego depletion, and AS.
70	Lian et al. (2012)	2012	Definition of abusive supervision from Tepper's (2000) was used.	Social learning theory.	Study 1, power distance orientation moderated the relation between abusive supervision and outcomes. Study 2, the same of study 1 and peer-rated interpersonal deviance. Study 3, same of study 1, perception of likelihood of rewards and self-regulation impairment mediated the relation.	Three longitudinal studies (countries are not mentioned). Study 1 (T1 y T2, two weeks apart). Investigate on subordinates their perception of abusive supervision. Study 2 (T1, T2 and T3, one week apart). Investigate on dyads the subordinates perception of abusive supervision. Study 3 (T1, T2 and T3, one week apart). Investigate on subordinates their perception of abusive supervision.	Study 1, employed from online forums (N= 268). Study 2, dyads of subordinates and peers' from different companies recruited by advertisements (N= 171). Study 3, employed from online forums (N= 198).	On all the studies was applied only on subordinates the 15-items scale from Tepper's (2000).	Study 1, was found positively correlated abusive supervision with interpersonal deviance; also, was found significant the relation when power distance orientation was high. Study 2, was found positively correlated abusive supervision with peer-rated interpersonal deviance; as well, interpersonal justice was significant on high and low power distance orientation. Study 3, was found as well, positi…	Study 1, the data was collected from the same source. Studies 1 and 2, did not assess the theory for mediating the model. As well, on all studies the samples were not randomly selected.
71	Lian et al. (2014a)	2014	Definition of abusive supervision from Tepper's (2000) was used.	Self-control theory.	Study 1, self-control capacity and motivation to self-control moderates the relation between abusive supervision and supervisor-directed aggression. Study 2, hostility toward mediated the relation between abusive supervision and supervisor-directed aggression; also, is moderated by self-control capacity and motivation to self-control.	Two longitudinal studies in Canada. Both Studies (T1, T2, and T3, one week apart). Investigate on subordinates their perception of abusive supervision.	Study 1, employed from online forums (N= 196). Study 2, employed from different companies recruited by many sources (N= 188).	On both studies was applied on subordinates the 15-items scale from Tepper's (2000).	Study 1, was found a positively correlated abusive supervision with supervisor-directed aggression; as well, this was found significant when supervisor coercive power was low and self-control capacity was low. Study 2, also, was found positively correlated abusive supervision with supervisor-directed aggression; and, the interaction of abusive supervision and self-control capacity was found signi…	Was not used a random participants sampling, also only was from one source (subordinates). As well, the cross-sectional design does not allow causal inferences.
72	Lian et al. (2014b)	2014	Definition of abusive supervision from Tepper's (2000) was used.	Various theoretical perspectives, e.g. Victimization theory perspective and self-control theory.	Study 1, the relation between abusive supervision and organizational deviance. Study 2, subordinate self-control capacity and intention to quit moderated the relation between abusive supervision and organizational deviance.	Two longitudinal studies (countries are not mentioned). Study 1 (T1 and T2, 20 months apart). Investigate on subordinates their perception of abusive supervision. Study 2, (T1 and T2, 6 months apart). Investigate on subordinates their perception of abusive supervision.	Study 1, participants from previous authors studies (N= 151). Study 2, also, participants from previous authors studies (N= 125).	On both studies was applied on subordinates the 15-items scale from Tepper's (2000).	Study 1, was found time lagged was significant effect of organizational deviance on abusive supervision. Study 2, the same of study 1; also, was significant effect of abusive supervision on organizational deviance; as well, was significant when self-control capacity was low and intention to quit was high but not when intention to quit was low.	Was used a cross-lagged design, under this cannot yield causal inferences; also, the data were from a single source. Another, the time lag used, is unknown what time lag is the appropriate.
73	Liang et al. (2016)	2016	Definition of abusive supervision from Tepper's (2000) was used.	Victimization theory.	Study 1, not measured abusive supervision. Study 2 and 3, supervisor hostile attribution and mindfulness moderates the positive relation between subordinate performance and abusive supervision, this relation is mediated by supervisor hostility toward the subordinate.	Three studies, two experimental and one empirical. Study 1, did not measure abusive supervision. Study 2, a experimental study in United States and Canada. Investigate on supervisors their own perception of abusive supervision. Study 3, a longitudinal study in China (T1 and T2, one week apart). Investigate on teams the subordinates perception of abusive supervision.	Study 1, not measured abusive supervision. Study 2, was employed registered with Amazon’s MTurk (N= 101). Study 3, teams of supervisor and employees from four financial organizations (N= 206 subordinates, and N= 50 supervisors).	Study 2, was applied on supervisor the abusive supervision active-aggressive 5-items from Mitchell and Ambrose 10-items scale (2007). Study 3, was applied on subordinates only, the 15-items scale from Tepper's (2000).	Study 2, was found significant the relation between abusive supervision and the emotion manipulation when mindfulness was low, but not when was high. Study 3, was fount not significant the relation between supervisor hostility toward the subordinate and abusive supervision; and, was found significant the relation of supervisor mindfulness and supervisor hostility toward abusive supervision.	Was not examined all the antecedents of abusive supervision.
74	Liang et al. (2018)	2018	Definition of abusive supervision from Tepper's (2000) was used.	Theory of retaliation and equity theory.	Retaliation moderates the positive relation between abusive supervision and injustice perceptions.	Two experimental studies. Study 1, in United States and Canada. Investigate on subordinates their perception of abusive supervision. Study 2 (country is not mentioned). Investigate the same of study 1.	Study 1, was employed registered with Amazon’s MTurk (N= 195). Study 2, students who were also employed worked (N= 150).	On both studies, was applied on subordinates the abusive supervision active-aggressive 5-items from Mitchell and Ambrose 10-items scale(2007).	Study 1, was found not significantly differ between participants in the abusive supervision/retaliation condition and participants in the control condition. Study 2, was found under abusive supervision a greater implicit injustice perceptions on participants in no retaliation condition, versus participants under retaliation condition.	Was examined only one function of retaliation and this was performed by the subordinate.
75	Liao and Liu (2015)	2015	Definition of abusive supervision from Tepper's (2000) was used.	Theory borrowing and social exchange theory.	Supervisor-student exchange mediated the negative relation between abusive supervision and psychological capital, and team member support moderated this positive effect.	One longitudinal study in China (T1 and T2, three months apart; and T3, one week after last survey). Investigate on subordinates their perception of abusive supervision.	Graduate students from six different universities (N= 222).	Was applied on subordinates the abusive supervision 10-items scale from Mitchell and Ambrose (2007).	Was found negatively correlated abusive supervision to psychological capital, the relation was positively moderated by team member support; and, was fully mediated by supervisor-student exchange.	The participants were students and this limited the validity; and, the data was from only one source (subordinates) with self-reports.
76	Liao et al. (2018)	2018	Definition of abusive supervision from Tepper's (2000) was used.	Moral cleansing theory.	Both studies, experienced guilt and perceived loss of moral credits mediated the relation between perpetrating abusive supervisor behavior, and increases in consideration and initiating structure behaviors; and, is moderated by moral attentiveness and courage.	Two studies in China. Both, a daily studies (one day, and after one week 10 consecutive working days). Investigate on dyads the supervisor own perception of abusive supervision.	Study 1, dyads of supervisor and subordinate from retail state company (N= 568). Study 2, dyads of supervisor and subordinate from footwear manufacturing company (N= 664).	Was applied on supervisors the 5-items scale from Johnson et al. (2012).	Study 1, was found positively related abusive supervisor behavior to experienced guilt; and, leader moral courage strengthen this indirect effect. Study 2, was found positively related abusive supervisor behavior with the increases in perceived loss of moral credits and experienced guilt; also, was positively related leader moral attentiveness with abusive supervisor behavior, experienced guilt a…	Was not found any curvilinear effects, also the studies were on the same country.
77	Liao et al. (2021)	2021	Definition of abusive supervision from Tepper's (2000) was used.	Multilevel theory and cognitive neoassociation theory of aggression.	On both studies, task reflexivity and rumination mediated the positive relation between abusive supervisor behavior and task performance and leader directed deviance, the relation is moderated by performance promotion and injury initiation.	Two studies. Study 1, a daily study in USA (two weeks). Investigate on subordinates their perception of abusive supervision. Study 2, a daily study in China (two weeks). Investigate on dyads the subordinates perception of abusive supervision.	Study 1, employed from different companies recruited by Prolific (online research platform) (N= 131). Study 2, dyads of supervisor and subordinate from real state company (N= 74).	Study 1, applied on subordinates the active-aggressive 5-items from Mitchell and Ambrose 10-items scale (2007). Study 2, applied only on subordinates the 5-items scale from Johnson et al. (2012).	On both studies, was found positively related AS to task reflexivity when performance promotion was high, and positively related AS to rumination when injury initiation was high.	The causal inferences cannot be establish, and situational factors was not consider.
78	Liu and Liu (2018)	2018	Definition of abusive supervision from Tepper's (2000) was used.	Uncertainty management theory.	Perceptions of organizational politics (POPs) mediated the positive relation between abusive supervision and political behavior, this is moderated by machiavellianism and guanxi.	One cross-sectional study in China. Investigate on dyads the subordinates perception of abusive supervision.	Dyads of supervisor and subordinate from a taxation bureau company (N= 280).	Was applied on subordinates only the abusive supervision active-aggressive 5-items from Mitchell and Ambrose 10-items scale(2007).	Was found a positive relation between abusive supervision, POPs and political behavior; also, was found significantly the interaction between abusive supervision and machiavellianism.	The cross-sectional design does not allow causal inferences; also, was only from one company.
79	Liu and Wang (2013)	2013	Definition of abusive supervision from Tepper's (2000) was used.	Social exchange theory and balance theory.	Negative relation between abusive supervision and organizational citizenship behaviors (towards individuals and organization), guanxi mediated this relation.	One cross-sectional study in China. Investigate on dyads the subordinates perception of abusive supervision.	Dyads of supervisor and subordinate from a taxation bureau company (N= 280).	Was applied on subordinates only the abusive supervision active-aggressive 5-items from Mitchell and Ambrose 10-items scale(2007).	Was found negatively correlated abusive supervision to guaixi and OCBI, an not with OCBO. As well, guaxi was mediated the relation between abusive supervision and OCBO.	The study focused only on one mediator; and, under cross-sectional design is limited allow causal inferences. Also, was not control the dyadic relation.
80	Liu et al. (2010)	2010	Definition of abusive supervision from Tepper's (2000) was used.	Social exchange theory and cognitive consistency theory.	Both studies, revenge cognitions mediated the positive relation between abusive supervision and supervisor-directed deviance, the relation is moderated by traditionality.	Two longitudinal studies in China. Study 1 (T1 and T2, nine months apart). Investigate on dyads the subordinates perception of abusive supervision. Study 2 (T1, T2 and T3, four months apart). Investigate the same of study 1.	Study 1, dyads of supervisor and subordinate from six electronic companies (N= 283 subordinates, and N= 112 supervisors). Study 2, dyads of supervisor and subordinate from two oil and gas enterprises (N= 222 subordinates, and N= 99 supervisors).	On both studies, was applied on subordinates only the 15-items scale from Tepper's (2000).	Study 1, was found positively related abusive supervision with revenge cognitions and supervisor-directed deviance; also, was found revenge cognitions fully mediated the effect of abusive supervision and traditionality on subordinate supervisor-directed deviance. Study 2, was found positively related abusive supervision with revenge cognitions, subordinate and supervisor-directed deviance; as wel…	The variables traditionality and abusive supervision were measured on same source; also, the time lag on both studies can be influence by other factors.
81	Liu et al. (2012)	2012	Definition of abusive supervision from Tepper's (2000) was used.	Social learning theory.	Team leader abusive supervision mediated the negative relation between leader abusive supervision and team member creativity; and, team member–attributed motives moderated the indirect effect of the relation.	One longitudinal study in USA (T1, T2 and T3, one month apart). Investigate on teams the supervisor and subordinates perception of abusive supervision.	Teams of supervisors and subordinates from automobile manufacturing company (N= 762 subordinates, and N= 108 supervisors).	Was applied on team members and leaders the 15-items scale from Tepper's (2000).	Was found negatively related team leader abusive supervision to team member creativity; also, was found significant the indirect effect of department leader abusive supervision and team leader–attributed performance promotion motives on team leader abusive supervision; and, was found significantly moderated the indirect effect of department leader abusive supervision on team member creativity via…	Were not test the relation between team leader abusive supervision and subordinate creativity.
82	Lukacik and Bourdage (2019)	2019	Definition of abusive supervision from Tepper's (2000) was used.	Social learning theory.	Positive and negative relation between abusive supervision, ethical leadership and impression management (IM) behaviors; and, role model moderated the relation.	One cross-sectional study in Canada and USA, investigate on subordinates their perception of abusive supervision.	Employed registered with Amazon’s MTurk (N= 288).	Was applied on subordinates the 15-items scale from Tepper's (2000).	Was found positively associated abusive supervision with supervisor and coworker targeted self-promotion, intimidation, exemplification, excuses, justifications and supplication (IM); as well, was found role modeling significantly moderated the relation.	The data was self-reported; also, the number of coworkers participants was low.
83	Lyu et al. (2016)	2016	Definition of abusive supervision from Tepper's (2000) was used.	Social identity theory.	Organizational identification mediated the negative relation between abusive supervision and proactive customer service performance (PCSP), and collectivism moderated this relation.	One longitudinal study in China (T1 and T2, one month apart), investigate on dyads the subordinates perception of abusive supervision.	Dyads of subordinate and coworker from twelve hotels (N= 198).	Was applied on subordinates only the 15-items scale from Tepper's (2000).	Was found negatively related abusive supervision to organizational identification and PCSP, as well, was found more negatively related abusive supervision to organizational identification when collectivism was high on employees.	The reverse causal relation was not possible to rule out; also, the study was in China and only reflect the influence of this culture.
84	Mackey et al. (2015)	2015	Definition of abusive supervision from Tepper's (2000) was used.	Reactance theory and displaced aggression theory.	On both studies, employee empowerment moderated the relation between abusive supervision and coworker/supervisor directed deviance.	Two studies in USA. Study 1, a cross-sectional study. Investigate on subordinates their perception of abusive supervision. Study 2, a longitudinal study (T1 and T2, one to three months apart). Investigate the same of study 1.	Study 1, employed members of hotel association (N= 96). Study 2, employed from different companies (N= 130).	On both studies, was applied on subordinates the 15-items scale from Tepper's (2000).	On both studies, supervisor and coworker-directed deviance was found significantly by abusive supervision, and also, was found positive and statistically significant low and high empowerment to abusive supervision.	The variable of supervisor-directed deviance were measured only with two items, also the common method bias may increase with self-reported measures.
85	Mackey et al. (2018)	2018	Definition of abusive supervision from Tepper's (2000) was used.	Social exchange theory.	All studies, perceived organizational obstruction mediated the negatively relation between abusive supervision and organizational citizenship behaviors toward organizations (OCBOs), and supervisor organizational embodiment (SOE) moderated this relation.	Three longitudinal studies in China and USA. Study 1, in USA (T1 and T2, three weeks apart), investigate on subordinates their perception of abusive supervision. Study 2, in USA (T1, T2 and T3, three weeks apart), investigate the same of study 1. Study 3, in China (T1, T2 and T3, three weeks apart), investigate on dyads the subordinates perception of abusive supervision.	Study 1, employed registered with Qualtrics' Panel Management Services (N= 109). Study 2, employed registered with Amazon’s MTurk (N= 213). Study 3, dyads of supervisor and subordinate from a internet company (N= 228 subordinates and N= 44 supervisors).	Study 1 and 3, was applied on subordinates only the abusive supervision active-aggressive 5-items from Mitchell and Ambrose 10-items Scale(2007). Study 2, was applied on subordinates the 15-items scale from Tepper's (2000).	Study 1, was found not significantly the relation between abusive supervision and OCBOs, as well, was found a significant indirect effect of abusive supervision on OCBOs through perceived organizational obstruction at lower and higher levels of SOE. Study 2, was found significantly and negatively associated abusive supervision to OCBOs, and, was found the same indirect effect of study 1. Study 3,…	The measures self-reported can lead to limitations, also was not included control variables in the studies.
86	Mackey et al. (2020)	2020	Definition of abusive supervision from Tepper's (2000) was used.	Ego depletion theory and LMX theory.	Ego depletion mediated the relation between abusive supervision and supervisor-directed destructive voice, and LMX differentiation moderated the relation.	One longitudinal study in China (T1, T2 and T3, four weeks apart). Investigate on dyads the subordinates perception of abusive supervision.	Dyads of supervisor and subordinate from a large internet company (N= 51 supervisors and N= 219 subordinates).	Was applied only on subordinates the active-aggressive 5-items from Mitchell and Ambrose 10-items scale (2007).	Was found positively associated As with ego depletion, also As was found with a significant positive indirect effect on supervisor-directed destructive voice via ego depletion.	The sample were only from one county (China), and the measure of voice may engage in multiples forms of voice.
87	Mardanov and Cherry (2018)	2018	Definition of abusive supervision from Tepper's (2000) was used.	None.	Abusive supervision moderated the relation between negative acts and outcomes.	One longitudinal study in USA (T1 and T2, one month apart). Investigate on subordinates their perception of negative workplace behaviors.	Employed registered on the local Chamber of Commerce (N= 78).	Was applied on subordinates the 15-items scale from Tepper's (2000).	Was found a stronger relation between coworker bullying (CB) and abusive supervision and negative acts, also, was found positively related abusive supervision with peer bullying and mobbing.	The relation with workplace harassment was not test it, also, the study was focused only on one country. As well, was not consider the impact on variables of race, gender and age.
88	Mawritz et al. (2012)	2012	Definition of abusive supervision from Tepper's (2000) was used.	Social learning theory and social information processing theory.	Abusive supervisor behavior mediated the positive relation between abusive manager behavior and work group interpersonal deviance; and, hostile climate moderated the relation.	One cross-sectional study in USA. Investigate on teams the supervisors and subordinates perception of abusive supervisor and manager behavior (supervisors reported the abusive behavior of their managers).	Teams of supervisor and subordinates from different industries (N= 288).	Was applied on supervisors and subordinates the 15-items scale from Tepper's (2000).	Was found positively related abusive manager behavior to abusive supervisor behavior, and this abusive supervisor behavior, as well, was found positively related to work group interpersonal deviance, this was moderated by hostile climate.	The cross-sectional design is limited allow causal inferences; also, the variable of workgroup interpersonal deviance was assessed only by the supervisor.
89	Mawritz et al. (2014a)	2014	Definition of abusive supervision from Tepper's (2000) was used.	Transactional theory of stress.	Abusive supervision mediated the relation between perceived hostile climates and outcomes, and supervisor/employee conscientiousness moderated the relation.	One cross-sectional study in USA, investigate on dyads the subordinates perception of abusive supervision.	Dyads of supervisor and subordinate of undergraduate students from a university and are working at different companies (N= 221).	Was applied on subordinates only the 15-items scale from Tepper's (2000).	Was found the relation of perceived hostile climate and abusive supervision relation was moderated by supervisor conscientiousness, but employee conscientiousness did not moderated the relation between abusive supervision and psychological withdrawal relationship	The cross-sectional design limited allow causal inferences, also, the measure of hostile climates was only for supervisors.
90	Mawritz et al. (2014b)	2014	Definition of abusive supervision from Tepper's (2000) was used.	Cognitive theory of stress.	Supervisor hindrance stress, anger and anxiety mediated the positive relation between supervisor exceedingly difficult goals and abusive supervision.	One cross-sectional study in USA, investigate on dyads only the subordinates perception of abusive supervision.	Dyads of supervisor and subordinate from different industries (N= 215).	Was applied on subordinates only the abusive supervision active-aggressive 5-items from Mitchell and Ambrose 10-items scale(2007).	Was found positively related supervisor anger and anxiety to abusive supervision; as well, was found the indirect effect of supervisor hindrance stress on abusive supervision significant through anger and anxiety.	The data was measure more from the supervisors and only one variable by subordinates; also, the cross-sectional design limited allow causal inferences. As well, was a low response rate.
91	Mawritz et al. (2017)	2017	Definition of abusive supervision from Tepper's (2000) was used.	Self-regulation theory.	Study 1, supervisor self-regulation impairment mediated the relation between subordinate deviance and abusive supervision, subordinate performance and supervisor bottom-line mentality (BLM) moderated this relation. Study 2, the same model of study 1; additionally, social exchange relationship mediated the relation.	Two longitudinal studies in USA. Study 1 (T1 and T2, two weeks apart). Investigate on dyads the subordinates perception of abusive supervision. Study 2 (T1, T2, T3 and T4, one week apart). Investigate the same of study 1.	Study 1, dyads of supervisor and subordinate registered with Amazon’s Mturk (N= 165). Study 2, dyads of supervisor and subordinate from management company (N= 169 subordinates, and N= 103 supervisors).	On both studies, was applied on subordinates only the 15-items scale from Tepper's (2000).	Study 1, was found positively related self-regulation impairment to abusive supervision; also, was found subordinate deviance had a significant conditional indirect effect on abusive supervision through self-regulation impairment only when subordinate performance was higher. Study 2, the direct effect from subordinate deviance to abusive supervision was found significant; also, was found signific…	The samples on both studies were small.
92	Meglich et al. (2019)	2019	Definition of abusive supervision from Tepper's (2000) was used.	Social exchange theory.	Employee mobility partially mediated the negative relation between supervisor competence and abusive supervision.	One cross-sectional study in USA. Investigate on subordinates their perception of abusive supervision.	Employed from different companies (N= 749).	Was applied on subordinates the 15-items scale from Tepper's (2000).	Supervisor competence was found positively related to perceived employee mobility, but negatively related to abusive supervision; additionally, was found significant the indirect of supervisor competence on abusive supervision through employee mobility.	The data was with self-reported surveys; also, the variable to measure supervisor competence were unidimensional.
93	Meng et al. (2017)	2017	Definitions of abusive supervision from Tepper's (2007) was used.	Componential theory of creativity, cognitive evaluation theory and social exchange theory.	LMX and intrinsic motivation mediated the relation between abusive supervision and creativity.	One cross-sectional study in China. Investigate on subordinates their perception of abusive supervision.	Students from four universities and worked (N= 857).	Was applied on subordinates the 15-items scale from Tepper's (2000).	Was found negatively related abusive supervision to LMX, intrinsic motivation and creativity.	The data were collected from the same source; also, the mean of the abusive supervision variables was lower. As well, the cross-sectional design limited causal inferences.
94	Michel et al. (2016)	2016	Definition of abusive supervision from Tepper's (2000) was used.	Affective events theory.	Both studies, work-related negative affect mediated the positive relation between abusive supervision and workplace deviance, this is moderated by aggressiveness.	Two longitudinal studies in USA. Study 1 (T1 and T2, one month apart). Investigate on subordinates their perception of abusive supervision. Study 2 (T1 and T2, one week apart). Investigate the same of study 1.	Study 1, employed registered with StudyResponse (N= 355). Study 2, employed registered with Amazon’s MTurk (N= 256).	On both studies, was applied on subordinates the 15-items scale from Tepper's (2000).	Study 1, was found significantly related abusive supervision to work-related negative affect; also, was found a significant relation between abusive supervision with organizational deviance and supervisor-directed deviance; and, the indirect effect between abusive supervision and workplace deviance increase the effect with higher levels of aggressive. Study 2, was found the same results of study …	Was used self-reported measures; also, was the lack of a true longitudinal study between-individual and within-individual.
95	Mitchell and Ambrose (2012)	2012	None.	Social psychology theory.	All the studies. Locus of control (LOC), behavioral modeling, fear of retaliation and displaced aggression moderated the positive relation between supervisor aggression and outcomes.	Three studies in USA. Study 1, a experimental study did not measure abusive supervision. Study 2, a empirical cross-sectional study. Investigate supervisor aggression on employed. Study 3, a longitudinal study (T1 and T2, three weeks apart). Investigate the same of study 2.	Study 2, individuals randomly selected (N= 278). Study 3, employed from different companies (N= 243).	Study 1, did not measured abusive supervision. Studies 2 and 3, was applied on subordinates the abusive supervision active-aggressive 5-items from Mitchell and Ambrose 10-items scale(2007) to measure supervisor aggression.	Study 2, was found significantly moderated the relation between LOC and the positive effect of supervisor aggression on retaliation. Study 3, was found when LOC was higher the effects of supervisor aggression were stronger on reconciling and reporting to authorities.	The studies not examined responses to aggression; also, the self-reported data could influence method bias.
96	Mitchell et al. (2015)	2015	Definition of abusive supervision from Tepper's (2000) was used.	Deontic justice theory and scope of justice theory.	Anger and contentment mediated the relation between abusive supervision of the coworker and third parties’ outcomes, this is moderated by exclusion beliefs and moral identity.	One longitudinal study in USA (T1 and T2, one month apart). Investigate on subordinates their perception of abusive supervision over coworkers.	Employed from different companies (N= 221).	Was applied on subordinates the 15-items scale from Tepper's (2000) to measure the perception of abusive supervision of the coworker.	Was found significant and negative the interaction between abusive supervision and exclusion beliefs on anger; also, was found more positive strongly the relation between abusive supervision and anger when exclusion beliefs were lower; and was as well, positive strongly abusive supervision with contentment when exclusion beliefs were higher.	The data were collected from the same source; also, the causality is a concern.
97	Mullen et al. (2018)	2018	Definition of abusive supervision from Tepper's (2000) was used.	Reactance theory and trickle-down effect.	Study 1, safety climate mediated the negative relation between abusive supervision and safety outcomes. Study 2, also, the relation between transformational leadership and supervisor incivility.	Two cross-sectional studies in Canada. Both studies investigate on subordinates their perception of abusive supervision.	Study 1, employed on healthcare field (N= 145). Study 2, nurses (N= 177).	On both studies, was applied on subordinates the 15-items scale from Tepper's (2000).	Safety climate and psychological health was predicted by abusive supervision; also, was found safety climate full mediated the relation between abusive supervision and safety participation and psychological health.	The cross-sectional design limits results; also, the variables were measured from the same source.
98	Naeem et al. (2020)	2020	Definition of abusive supervision from Tepper's (2000) was used.	Affective events theory.	Supervisor negative emotions mediated the negative relation between perceived subordinates negative workplace gossip and abusive supervision, the relation is moderated by supervisor emotional regulation.	One cross-sectional study in China. Investigate on dyads the subordinates perception of abusive supervision.	Dyads of supervisor and subordinate from variety of industries (N= 326).	Was applied on subordinates only the active-aggressive 5-items from Mitchell and Ambrose 10-items scale (2007).	Was found positively associated negative workplace gossip to supervisor negative emotions, and positively associated supervisor negative emotions to AS. Also, was found subordinate negative workplace gossip had an indirect effect on AS through supervisor negative emotions.	The data were cross-sectional and this limits causality, the dyadic data can be a limitation because AS operate at team level.
99	Nandkeolyar et al. (2014)	2014	Definition of abusive supervision from Tepper's (2000) was used.	Self-regulation theory.	Both studies. Conscientiousness, active and avoidance coping moderated the negative relation between abusive supervision and job performance.	Two cross-sectional studies in India. Both studies investigate on subordinates their perception of abusive supervision.	Study 1, employed on insurance claims company (N= 363). Study 2, medical diagnostic equipment company (N= 105).	Study 1, was applied on subordinates the abusive supervision active-aggressive 5-items from Mitchell and Ambrose 10-items scale (2007). Study 2, was applied on subordinates the 15-items scale from Tepper's (2000).	Study 1, was found positive and marginally significant the relation between abusive supervision and conscientiousness; as well, was found negative and significant the effects of abusive supervision on performance when conscientiousness was low. Study 2, was found the same of study 1; additionally, was found not significant the interaction between abusive supervision and active coping, but was neg…	The cross-sectional design of the studies limited allow causal inferences; also, the measure of abusive supervision capture only subordinate perception and not actual supervisor behaviors. As well, on study 2 the samples was small.
100	Neves (2014)	2014	Definition of abusive supervision from Tepper's (2000) was used.	Perceived organizational support theory.	Abusive supervision mediated the negative relation of core self-evaluation (CSE) and coworker support with in-role and extra-role performance; this relation is moderated by downsizing.	One cross-sectional study in Portugal. Investigate on dyads the subordinates perception of abusive supervision.	Dyads of supervisor and subordinate from multiple companies (N= 193).	Was applied on subordinates only the 15-items scale from Tepper's (2000).	Was found negatively related CSE and coworker support to abusive supervisor; also, this relation was found significant on the interaction effect with downsizing. As well, was found significant the indirect effects of CSE on in-role and extra-role performance with abusive supervision.	The cross-sectional design limited allow causal inferences; also, was not measure the procedure under submissive subordinates rate more abusive supervision.
101	Neves and Cunha (2018)	2018	Definition of abusive supervision from Tepper's (2000) was used.	Conservation of resources theory.	Coworker humor moderated the positive relation between abusive supervision and interpersonal deviance, via workplace ostracism.	One cross-sectional study in Portugal. Investigate on dyads the subordinates perception of abusive supervision.	Dyads of supervisor and subordinate from multiple companies (N= 518).	Was applied on subordinates only the 15-items scale from Tepper's (2000).	Was found positively related abusive supervision to workplace ostracism, and was a significant moderated by humor. Also, was found stronger the relation between abusive supervision and interpersonal deviance via ostracism when coworker humor was low.	The cross-sectional design limited allow causal inferences; also, on the coworkers variables was not measured threat and types of humor.
102	Nevicka et al. (2018)	2018	Definition of abusive supervision from Tepper's (2000) was used.	None.	Study 1, follower self-esteem moderated the positive relation between leader narcissism and abusive supervision. Study 2, abusive supervision mediated the relation between leader narcissism and follower task performance and exhaustion, this relation is moderated by follower core self-evaluations.	Two cross-sectional studies in the Netherlands. Both studies. Investigate on dyads the subordinates perception of abusive supervision.	Study 1, supervisors and subordinates from different industries (N= 128 subordinates, and N= 85 supervisors). Study 2, dyads of supervisor and subordinate from multiple companies (N= 177).	On both studies. Was applied on subordinates only the abusive supervision active-aggressive 5-items from Mitchell and Ambrose 10-items scale(2007).	Study 1, was found a negative relation between follower self-esteem and abusive supervision, but was not main effect between leader narcissism and abusive supervision. Study 2, was found a negative relation between follower core self-evaluations and abusive supervision; as well, was found positively related leader narcissism to abusive supervision when follower core self-evaluations was low; addi…	The cross-sectional design limited allow causal inferences; also, the abusive supervision variable were measured subjective perceptions and this could not reflect actual levels. As well, the supervisor nominate the follower on the study 1, this selection can have some bias.
103	Ogunfowora et al. (2021)	2021	None.	Attachment theory and social identity theory.	Study 1, group attachment avoidance, anxiety and group identification mediated the relation between abusive supervision differentiation (ASD) and quit intentions, psychological distress and unethical behaviors. Study 2, the same mechanisms; additionally, envy and resentment towards other group members mediated the relation, and own abusive supervision moderated this.	Two studies in the Canada. Study 1, a cross-sectional study. Investigate on teams the subordinates perception of abusive supervision. Study 2, a longitudinal (T1, T2 and T3, two weeks apart). Investigate on subordinates their perception of abusive supervision.	Study 1, teams of supervisor and subordinates from different companies (N= 612 subordinates, and N= 131 supervisors). Study 2, was employed registered with Amazon’s MTurk (N= 204).	On both studies, was applied on subordinates only 7-items from the 15-items scale from Tepper's (2000).	Study 1, was found positively related ASD to attachment anxiety and avoidance; also, negatively related to group identification; as well, was found directly related ASD to quit intentions, psychological distress and unethical behaviors. Study 2, was found stronger the indirect effect of ASD perceptions on psychological distress when own abusive supervision is high.	The cross-sectional data limited the development of factors and group attachment; also, both studies were measured with self-reported data and individual perception of ASD.
104	Ouyang et al. (2015)	2015	Definition of abusive supervision from Tepper's (2000) was used.	Social identity theory and social role theory.	Perceived insider status mediated the relation between abusive supervision and problem prevention, taking charge and voice, this relation is moderated by the gender.	One cross-sectional study in China. Investigate on dyads the subordinates perception of abusive supervision.	Dyads of supervisor and subordinate from four telecommunication equipment companies (N= 350).	Was applied on subordinates only the 15-items scale from Tepper's (2000).	Was found negatively associated abusive supervision with perceived insider status, and these had stronger negative effect when subordinates were female. As well, was found negative and significant direct effects of abusive supervision over problem prevention, taking charge and voice.	The cross-sectional design limited allow causal inferences; also, the data were collected with self-reports from a single company from one country. As well, on the model only was used one moderator.
105	Pan and Lin (2018)	2018	Definition of abusive supervision from Tepper's (2000) was used.	Power/resource interdependence and victim precipitation theory.	Abusive supervision mediated the relation between supervisors negative affect and subordinates negative affect, job satisfaction and personal initiative; this relation is moderated by LMX.	One cross-sectional study in China. Investigate on dyads the subordinates perception of abusive supervision.	Dyads of supervisor and subordinate from five hotels (N= 180).	Was applied on subordinates only the 15-items scale from Tepper's (2000).	Was found positively correlated supervisors negative affect with abusive supervision; also, was found positively correlated abusive supervision with subordinates’ negative affect and negatively correlated with job satisfaction and personal initiative. As well, when LMX was low, was significant the positive relation between supervisors’ negative affect and abusive supervision; and, not significant…	The data were collected from two sources but still is a potential of common method variance; also, the LMX variable was from subordinate perspective.
106	Pan et al. (2018)	2018	Definition of abusive supervision from Tepper's (2000) was used.	Activation theory.	Job dissatisfaction mediated the relation between abusive supervision and job-oriented constructive deviance (JCD), this relation is moderated by problem-focused coping.	One longitudinal study in China (T1 and T2, three weeks apart; and T3, two weeks apart). Investigate on dyads the subordinates perception of abusive supervision.	Dyads of supervisor and subordinate from four hotels (N= 198).	Was applied on subordinates only the abusive supervision 10-items scale from Aryee et al. (2007).	Was found positively and statistically significant abusive supervision with job dissatisfaction, but was not significantly related to JCD. As well, was found job dissatisfaction mediated the effect of abusive supervision on JCD.	Was not explore the constructive deviance and recursive effects on abusive supervision; also, this variable was only response by actual employed, and not for the ones who left the organization for abuse. As well, the moderators were only at individual level.
107	Park and Kim (2019)	2019	Definition of abusive supervision from Tepper's (2000) was used.	Psychological contract theory.	Psychological contract breach mediated the positive relation between abusive supervision and service sabotage, supervisor’s organizational embodiment (SOE) moderated these relation.	One longitudinal study in USA (T1 and T2, Three months apart). Investigate on subordinates their perception of abusive supervision.	Alumni from business school (N= 183).	Was applied on subordinates the 15-items scale from Tepper's (2000).	Was found positively correlated abusive supervision with psychological contract breach and service sabotage, and was found significant the indirect effect of abusive supervision on service sabotage via psychological contract breach, and the direct effect was not significant.	The sample size was small; also, was only hospitality graduates.
108	Park et al. (2018)	2018	Definition of abusive supervision from Tepper's (2000) was used.	Conservation of resources theory.	Both studies, psychological distress mediated the relations between abusive supervision and silence, this relation is moderated by the gender.	Two studies. Study 1, a experimental study in China. Investigate on subordinates their perception of abusive supervision. Study 2, a cross-sectional study in South Korea. Investigate the same of study 1.	Study 1, employed from different companies (N= 222). Study 2, employed from different companies (N= 402).	Study 1, was applied on subordinates the 15-items scale from Tepper's (2000). Study 2, was applied on subordinates the abusive supervision active-aggressive 5-items from Mitchell and Ambrose 10-items scale(2007).	Study 1, was found abusive supervision predicted psychological distress; also, was found not different indirect effect of abusive supervision on silence via psychological distress. Study 2, was found significant the effect of abusive supervision on psychological distress, and was found weaker the indirect effect of abusive supervision on silence via psychological distress.	Both studies were measured at one point in time and from the same source; also, were from countries with high value of power and authority.
109	Park et al. (2020)	2020	Definition of abusive supervision from Tepper's (2000) was used.	Conservation of resources theory.	Coworker support and self-efficacy moderated the relation between abusive supervision and task performance.	One cross-sectional study in South Korea. Investigate on dyads the subordinates perception of abusive supervision.	Dyads of supervisors and commanders from a military office (N=192).	Was applied on subordinates only the 15-items scale from Tepper's (2000).	Was found AS negatively related to task performance when coworker support was low.	The cross-sectional design limited cause and effect relation, also the sample were from a military army, where was a strong relation between subordinates and supervisors.
110	Peng et al. (2014)	2014	Definition of abusive supervision from Tepper's (2000) was used.	Social exchange theory.	Leader-member exchange (LMX) and affect-based trust in peers partially mediated the relation between own abusive supervision and outcomes, this relation is moderated by peer abusive supervision.	One cross-sectional study in China. Investigate on teams the subordinates perception of abusive supervision.	Teams (only subordinates) from twenty five companies (N= 358 subordinates, and N= 88 teams).	Was applied on subordinates 5-items from the 15-items scale from Tepper's (2000).	Was found a stronger negative relation between own abusive supervision and task performance when peer abusive supervision was low; as well, was found a significant negative relation between own abusive supervision and helping coworkers when peer abusive supervision was low, but not when was high.	The cross-sectional design limited allow causal inferences; also, the sample were from China a characterized collectivistic culture.
111	Peng et al. (2019)	2019	Definition of abusive supervision from Tepper's (2000) was used.	Appraisal theories of emotions.	Discrete emotions (shame, anger and fear) mediated the positive and negative relation between abusive supervision and outcomes, interpersonal justice was a controlled mediator. And, this relation is moderated by coworker abusive supervision.	One longitudinal study in China (T1, T2 and T3, seven weeks apart). Investigate on teams the subordinates perception of abusive supervision.	Teams (only subordinates) from website services and consultancy company (N= 245 subordinates, and N= 55 teams).	Was applied on subordinates the abusive supervision active-aggressive 5-items from Mitchell and Ambrose 10-items scale(2007).	Was found significant the interaction effect of own and coworker abusive supervision predicting shame and fear, but not significant predicting anger; also, was found was positively related abusive supervision to fear when coworker abusive supervision was higher but not when was lower. As well, abusive supervision was found positively related to interpersonal deviance via anger.	The study design limits infer causality; also, was not expected the positive relation between anger and voice behavior.
112	Perko et al. (2017)	2017	Definition of abusive supervision from Tepper's (2000) was used.	Stressor-detachment model and conservation of resources theory.	The relation between work-related rumination (WRR) and job demands, leadership, abusive supervision and outcomes.	One longitudinal study in Finland (T1 and T2, fourteen months apart; and T3, eight months after T2). Investigate on subordinates their perception of work-related rumination associated with abusive supervision.	Municipal employed from different occupations (T1, N = 554; T2, N = 333; and T3, N = 294).	Was applied on subordinates the abusive supervision active-aggressive 5-items from Mitchell and Ambrose 10-items scale(2007).	Was found on low levels of WRR more supervisor fairness and conflict management, and less abusive supervision. As well, when WRR increase, abusive supervision also increased and transformational leadership decreased.	The most of the sample were women; also, was a concern with distal variable analyses. As well, the scale used to measure WRR seems to be a conceptual contradiction.
113	Pradhan and Jena (2018)	2018	Definition of abusive supervision from Tepper's (2000) was used.	Conservation of resources theory.	Emotional intelligence moderated the positive relation between abusive supervision and subordinate’s intention to quit.	One longitudinal study in India (T1 and T2, three to four weeks apart). Investigate on subordinates their perception of abusive supervision.	Employed from a hospital chain (N= 353).	Was applied on subordinates the 15-items scale from Tepper's (2000).	Was found significantly related abusive supervision and intention to quit; and also, this relation was significantly moderated by emotional intelligence.	The data were from the same source and method and suffer bias.
114	Pradhan and Jena (2019)	2019	Definition of abusive supervision from Tepper's (2000) was used.	Workplace deviance theory, reactance theory and displaced aggression theory.	Intention to quit moderated the positive relation between abusive supervision, organizational and interpersonal deviance.	One cross-sectional study in India (with two times points, three to four weeks apart). Investigate on subordinates their perception of abusive supervision.	Employed from restaurants and hotels (N= 240).	Was applied on subordinates the 15-items scale from Tepper's (2000).	Was found intention to quit moderated the association between abusive supervision and organizational deviance; as well, with interpersonal deviance. Also, was found significant the effect of abusive supervision on organizational deviance and interpersonal deviance, this when intention to quit was higher.	The cross-sectional data were from the same source, and method suffer bias.
115	Pradhan et al. (2018)	2018	Definition of abusive supervision from Tepper's (2000) was used.	Conservation of resources theory and social role theory.	Gender moderated the positive relation between abusive supervision and intention to quit.	One longitudinal study in India (T1 and T2, three to four weeks apart). Investigate on subordinates their perception of abusive supervision.	Employed from subsidiaries of electricity company (N= 227).	Was applied on subordinates the 15-items scale from Tepper's (2000).	Was found significant gender differences on abusive supervision and intentions to quit, female respondents was higher than male; also, was significantly correlated abusive supervision with intentions to quit for female but insignificant on male.	The data were from the same source and method and suffer bias. Also, the sample were from one industry in one country.
116	Pradhan et al. (2020)	2020	Definition of abusive supervision from Tepper's (2000) was used.	Social exchange theory, justice theory and theory of displaced aggression.	Directed aggression and perceived contract violation mediated the positive relation between abusive supervision and knowledge hiding.	One cross-sectional study in India (with two times points, one month apart). Investigate on subordinates their perception of abusive supervision.	Employed from various IT firms (N=270).	Was applied on subordinates the active-aggressive 5-items from Mitchell and Ambrose 10-items scale (2007).	Was found positive related AS to knowledge hiding, and directed aggression and perceived contract violation partially mediated the relation.	The data were collected from a single source, and the sample size was small for a cross-sectional design.
117	Priesemuth and Bigelow (2020)	2020	Definition of abusive supervision from Tepper's (2000) was used.	Social self-preservation theory and social valuing perspective.	On both studies, social worth mediated the relation between enacted abusive supervision and outcomes, and is moderated by psychopathy.	Two studies. Study 1, cross-sectional study in Canada, investigate on dyads the supervisors own perception of abusive supervision. Study 2, longitudinal study, country is not mentioned (T1 and T2, three weeks apart), investigate in supervisors the own perception of abusive supervision.	Study 1, dyads of supervisor and subordinate from different companies (N= 111). Study 2, supervisor from different companies (N= 160).	On both studies, was applied on supervisor only the abusive supervision active-aggressive 5-items from Mitchell and Ambrose 10-items Scale(2007).	Study 1, was found an indirect effect of enacted abusive supervision on job performance and organizational citizenship behavior (OCB), also, was found psychopathy moderated the relation between enacted abuse and social worth, as well, was stronger for low psychopathic enacted the indirect effect of abusive supervision on OCB. Study 2, was found lower levels of psychopathy stop abusive acts.	Study 1, was cross-sectional and limits infer causality. Study 2, the data was from one source.
118	Pundt and Schwarzbeck (2018)	2018	Definition of abusive supervision from Tepper's (2000) was used.	Self-control theory.	Supervisor self-control capacity and external monitoring moderated the positive relation between supervisor irritation and abusive supervision.	One cross-sectional study in Germany. Investigate on dyads the subordinates perception of abusive supervision.	Dyads of supervisor and subordinate from multiple companies (N= 96).	Was applied on subordinates 13-items from the 15-items scale from Tepper's (2000).	Was found a linear positive and significant relation between supervisor irritation and abusive supervision; also, was found a significant negative relation between supervisor self-control capacities and abusive supervision. As well, the relation between supervisor irritation and supervisor self-control predicting abusive supervision.	The sample size was small; also, the supervisor chose and provide the subordinate. As well, was a cross-sectional study and limit allow infer causality.
119	Pyc et al. (2017)	2017	Definition of abusive supervision from Tepper's (2000) was used.	Job demand-control (JDC) model.	Anxiety and depression mediated the relation between abusive supervision, authoritarian leadership style and employees negative outcomes.	One cross-sectional study in USA. Investigate on subordinates their perception of abusive supervision.	Employed from a home health care agency (N= 232 nurses, and N= 24 supervisors).	Was applied on subordinates the 15-items scale from Tepper's (2000).	Was found a full mediation effect for abusive supervision through anxiety onto exhaustion, physical symptoms, job satisfaction and job performance; and, only partial mediation through depression onto intention to quit.	The sample attend to the office just two times per month; also, the study was from cross-sectional and self-reports.
120	Qin et al. (2018)	2018	Definition of abusive supervision from Tepper's (2000) was used.	Conservation of resources theory.	On both studies, empathic concern and job demands moderate the positive relation between abusive supervisory behavior and work engagement via recovery level.	Three studies. Study 1, a cross-sectional study in China. Investigate on teams the supervisors own perception of abusive supervision. Study 2, a cross-sectional study in USA. Investigate the supervisors own perception of abusive supervision. Study 3, a daily study in China (Ten consecutives working days). Investigate the same of study 2.	Study 1, university students (N= 64). Study 2, was employed registered with Amazon’s MTurk (N= 100). Study 3, supervisor from different companies (N= 72).	All studies, applied on supervisor only the abusive supervision active-aggressive 5-items from Mitchell and Ambrose 10-items scale(2007).	Studies 1 and 2, found on participants under abusive supervision condition rated higher their abusive behavior than those under control condition; as well, participants under abusive supervision conditions has a significantly higher levels of recovery than those under control condition. Study 3, was found positively related daily abusive supervisory behavior to daily recovery level; also, was fou…	Was measured within the same day the consequences of abuse behavior; also, the studies were on two countries this was controlled by supervisor power orientation but the analyses showed the variable did not moderated the relation.
121	Rafferty and Restubog (2011)	2011	Definition of abusive supervision from Tepper's (2000) was used.	Social exchange theory and power dependence theory.	Meaning of work, interactional justice and organizational-based self-esteem (OBSE) mediated the negative relation between abusive supervision with prosocial silence and voice behaviors.	One cross-sectional study in the Philippines. Investigate on dyads the subordinates perception of abusive supervision.	Dyads of supervisor and subordinate from a bank (N= 175).	Was applied on subordinates only the 15-items scale from Tepper's (2000).	Was found a significant negative relation between abusive supervision with interactional justice, meaning of work and OBSE; as well, was found significant the indirect relation between abusive supervision, interactional justice and prosocial voice.	The data abusive supervision was only reported by subordinates; and, the sample size was small.
122	Rafferty et al. (2010)	2010	Definition of abusive supervision from Tepper's (2000) was used.	Displaced aggression theory and behavioral plasticity theory.	Supervisor psychological distress and subordinate self-esteem moderated the positive relation between abusive supervision with outcomes.	One longitudinal study in the Philippines (T1 and T2, one month apart; and, T3 six months after T2). Investigate on dyads the subordinates perception of abusive supervision.	Dyads of supervisor, subordinate and partner from multiple companies (N= 175).	Was applied on subordinates only the 15-items scale from Tepper's (2000).	Was found significant and positive the relation between supervisor interactional injustice and abusive supervision; as well, abusive supervision and psychological distress. Also, was found not significantly associated distributive injustice with abusive supervision, but was significantly positively associated supervisor psychological distress with abusive supervision.	The data abusive supervision was only reported by subordinates, and is a possibility of common method effects.
123	Restubog et al. (2011)	2011	Definition of abusive supervision from Tepper's (2000) was used.	Social learning theory, social role theory and transactional theory of stress.	For both studies, abusive supervision and psychological distress mediated the relation between aggressive norms and outcomes; gender and occupation moderated the relation.	Two longitudinal studies in the Philippines. Study 1 (T1 and T2, one month apart; and, T3 six months after T2), investigate on triads the subordinates perception of abusive supervision. Study 2 (T1 and T2, six months apart). Investigate on dyads the subordinates perception of abusive supervision.	Study 1, triads of supervisor, subordinate and subordinates spouse from MBA part-time students who worked in multiples companies (N= 184). Study 2, dyads of subordinate and spouse from multiple restaurants (N= 188).	Was applied on subordinates only the 15-items scale from Tepper's (2000).	Study 1, was found significant the relation between aggressive norms and psychological distress via abusive supervision; and, abusive supervision and spouse undermining via psychological distress; also, was found positively related abusive supervision to supervisor-directed deviance. Study 2, was found positive the relation between aggressive norms and abusive supervision; also, was found positiv…	The mean of the variables of abusive supervision and family undermining were low; also, the data may have influence of socially behaviors and was from a collectivist country.
124	Rice et al. (2021)	2021	Definition of abusive supervision from Tepper's (2000) was used.	Social cognitive theory.	Abusive supervisor behavior mediated the relation between abusive manager behavior and subordinate deviance, and supervisory moral disengagement mediated the relation between abusive manager behavior and abusive supervisor behavior.	One cross-sectional study in USA. Investigate on dyads the subordinate and supervisor perception of abusive supervision.	Dyads of supervisors and subordinates from variety of organizations (N= 147).	Was applied on subordinates and supervisors the active-aggressive 5-items from Mitchell and Ambrose 10-items scale (2007).	Was found a significant indirect effect of abusive manager behavior on subordinate deviance through supervisory moral disengagement and abusive supervisor behavior.	The data was cross-sectional and limited make causal inferences, and the data were collected with surveys.
125	Richard et al. (2020)	2020	Definition of abusive supervision from Tepper's (2000) was used.	Social exchange theory and displaced aggression theory.	Turnover intentions mediated the relation between abusive supervision and interpersonal aggression, and power distance orientation (PDO) and perceived HR climate moderated the relation.	One cross-sectional study in China. Investigate on dyads the subordinates perception of abusive supervision.	Dyads of supervisor and subordinate from diverse occupations (N= 324).	Was applied on subordinates 13-item from the 15-items scale from Tepper's (2000).	Was found PDO moderated the relation between AS and turnover intentions, also was found positively related AS to turnover intention when perceived HR climate were low.	The variables PDO and perceived HR climate may strengthen or buffer the AS impact. The sample was from China where the power distance is higher.
126	Rodwell et al. (2014)	2014	Definition of abusive supervision from Tepper's (2000) was used.	Appraisal theory.	Job satisfaction and psychological strain mediated the relation between forms of abusive supervision (personal attacks, task attacks and isolation) and intent to quit.	One cross-sectional study in Australia. Investigate on subordinates their perception of abusive supervision.	Nurses from five different hospitals (N= 250).	Was applied on subordinates the 10-items scale from Dick and Rayner’s (2004).	Was found task attacks related directly and indirectly with increased intentions to quit via job satisfaction; as well, isolation was positively related to job satisfaction.	The cross-sectional design restricting allow causal inferences; also, the response rate was low.
127	Rousseau and Aubé (2014)	2014	Definition of abusive supervision from Tepper's (2000) was used.	Social identity theory.	Team commitment mediated the relation between team-based reward leadership and team performance, this relation is moderated by abusive supervision.	One cross-sectional study in Canada. Investigate on teams the subordinates perception of abusive supervision.	Teams of supervisor and subordinates from safety organization (N= 101 work teams, N= 381 subordinates, and N= 101 supervisors).	Was applied on subordinates only 6-items from the 15-items scale from Tepper's (2000).	Was found significant team commitment on team-based reward leadership when abusive supervision was low.	The cross-sectional design restricting allow causal inferences; also, some variable was only assessed by the subordinates and the common method bias may have influenced.
128	Rousseau and Aubé (2018)	2018	Definition of abusive supervision from Tepper's (2000) was used.	Social information processing theory.	Team proactive behavior mediated the relation between abusive supervision and team innovation; and, leader–members interdependence moderated this relation.	One cross-sectional study in Canada. Investigate on teams the subordinates perception of abusive supervision.	Teams of supervisor and subordinates from safety organization (N= 82 work teams, N= 394 subordinates, and N= 82 supervisors).	Was applied on subordinates only the 15-items scale from Tepper's (2000).	Was found significant the relation between abusive supervision and team proactive behavior; also, was found significant the indirect effect of abusive supervision on team innovation.	The cross-sectional design restricting allow causal inferences; also, three variable was only assessed by the subordinates on the team and the common method bias may have influenced.
129	Samreen and Rashid (2018)	2018	Definition of abusive supervision from Tepper's (2000) was used.	Moral licensing theory.	Organizational citizenship behavior (OCB) mediated the positive relation between abusive supervision and counterproductive work behavior (CWB).	One cross-sectional study in Pakistan. Investigate on teams the subordinates perception of abusive supervision.	Teams with only subordinates from twenty multi-sectorial organizations (N= 230 work teams, N= 920 subordinates).	Was applied on subordinates 5-items from the 15-items scale from Tepper's (2000).	Was found significantly and positively the relation between abusive supervision and CWB; also, was found a indirect significant effect of the relation through OCB.	The data were collected just in one country; also, the data was only from subordinate perception.
130	Schyns et al. (2018)	2018	Definition of abusive supervision from Tepper's (2000) was used.	Attribution theory.	In all studies, abusive supervision perceptions mediated the positive relation between leader behavior and reactions, this relation is moderated by attributions.	Three studies (countries are not mentioned). Study 1, a experimental study (T1 and T2, one week apart). Investigate on subordinates their perception of abusive supervision. Study 2, a experimental study (T1 and T2, two days apart). Investigate the same of study 1. Study 3, a cross-sectional study. Investigate the same of studies 1 and 2.	Study 1, employed registered with Qualtrics (N= 310). Study 2, employed registered with Respondi (N= 234). Study 3, employed registered with Respondi (N= 313).	All studies applied on subordinates only the 15-items scale from Tepper's (2000).	Study 1, was found abusive supervision partially mediated the relation between leader behavior and reactions. Study 2, was found abusive supervision related to reactions (except from prohibitive voice); also, was found significant the interaction between perception of abusive supervision and reactions. Study 3, was found positively related abusive supervision and attribution.	The experimental studies often are lack of external validity; also, the studies employed just one situation.
131	Shen et al. (2019)	2019	Definition of abusive supervision from Tepper's (2000) was used.	Self-concept theory.	Organizational-based self-esteem (OBSE) mediated the negative relation of abusive supervision and feedback-seeking behavior (FSB), this relation is moderated by leader-member exchange (LMX).	One cross-sectional study in China. Investigate on dyads the subordinates perception of abusive supervision.	Dyads of supervisor and subordinate from five different companies (N= 312).	Was applied on subordinates only the abusive supervision 10-items scale from Aryee et al. (2007).	Was found significantly negatively correlated abusive supervision to FSB and OBSE; also, was found partially mediated the impact of abusive supervision on FBS by OBSE.	The data were collected from five companies; also, the study ignored the influence of team on employees.
132	Shoss et al. (2013)	2013	Definition of abusive supervision from Tepper's (2000) was used.	Organizational support theory.	In all studies, perceived organizational support (POS) mediated the relation between abusive supervision and outcomes, and supervisor’s organizational embodiment (SOE) moderated this negative relation.	Three studies in the Philippines. Study 1, a longitudinal study (T1 and T2, three months apart). Investigate on dyads the subordinates perception of abusive supervision. Study 2 a cross-sectional study. Investigate the same of study 1. Study 3, a longitudinal study (T1 and T2, twelve months apart). Investigate on subordinates the perception of abusive supervision.	Study 1, dyads of supervisor and subordinate from MBA part-time students who worked in multiples companies (N= 148). Study 2, dyads of supervisor and subordinate from one organization (N= 254). Study 3, employed from a financial company (N=187).	All studies applied on subordinates 8-items from the 15-items scale from Tepper's (2000).	On all the studies was found a significant negative relation between abusive supervision and POS; also, was found significant the interaction between abusive supervision and SOE, but was found negatively related abusive supervision to POS with high SOE bot now on low SOE.	Was not assessed other factors that influence organization-directed behavior. As well, on study 1, the sample was small.
133	Shum and Gatling (2020)	2020	None.	Appraisal theory.	Guilt mediated the positive indirect relation between enacted abuse and intention to help followers, managerial abuse and agreeableness moderated the relation.	One cross-sectional study (country not mentioned). Investigate on supervisor the own perception of abusive supervision.	Employed in hospitality industries registered with Amazon’s MTurk (N= 285).	Was applied on supervisors the active-aggressive 5-items from Mitchell and Ambrose 10-items scale (2007).	Was found positively related perceived managerial abuse to enacted abuse, and positively related enacted abuse to guilt.	Was not possible infer causality between experienced guilt and intention to help followers, also, the cross-sectional design limited the interaction between participants.
134	Simon et al. (2015)	2015	Definition of abusive supervision from Tepper's (2000) was used.	Multimotive model of interpersonal threat.	Anger, fear and compassion partially mediated the negative relation between abusive supervision and outcomes.	One longitudinal study in USA (T1 and T2, one week apart; T3, T4, T5 and T6, one month apart). Investigate on subordinates their perception of abusive supervision.	Employed from different companies (N= 244).	Was applied on subordinates the 15-items scale from Tepper's (2000).	Was found positively and significantly abusive supervision to predicted supervisor-directed counterproductive behavior and avoidance; also, was found significantly abusive supervision predicted supervisor-directed citizenship behavior. As well, abusive supervision was found not significantly related to compassion, buy was found positively and significantly related to anger and fear.	The data were collected from one source; also, the variables of abusive supervision and subordinates’ behaviors was assessed only by the employee. As well, the time lag between measures was a concern.
135	Stein et al. (2020)	2020	Definition of abusive supervision from Tepper's (2000) was used.	Stress-as-offense-to-self (SOS) theory.	Hierarchical level moderated the positive relation between abusive supervision and illegitimate tasks (unnecessary and unreasonable).	One cross-sectional study in Germany. Investigate on subordinates their perception of abusive supervision.	Employed from healthcare and social services (N= 268).	Was applied on subordinates 12-item from the 15-items scale from Tepper's (2000).	Was found positively related AS to illegitimate tasks (unnecessary and unreasonable).	The causality effect cannot be draw, and the self-reported measures raises common method variance.
136	Subramaniam et al. (2015)	2015	None.	Self-determination theory, career development theory, social learning theory and social exchange theory.	Clinical learning environment moderated the positive and negative relation between coaching, mentoring and abusive supervision with talent development.	One cross-sectional study in Malaysia. Investigate on subordinates their perception of abusive supervision.	Doctors from six public hospitals (N= 355).	Was applied on subordinates the 15-items scale from Tepper's (2000).	Was found not significant the relation between abusive supervision and talent development, but was found clinical learning environment significant to moderated the relation between abusive supervision and talent development.	The cross-sectional design restricting allow causal inferences; also, the sample was from hospital industry.
137	Sulea et al. (2013)	2013	Definition of abusive supervision from Tepper's (2000) was used.	Norm of reciprocity theory, theory of displaced aggression and conservation of resources theory.	Personality moderated the positive relation between abusive supervision and organization-targeted counterproductive work behaviors (CWB-O).	One cross-sectional study in Romania. Investigate on subordinates their perception of abusive supervision.	Employed from three different companies (N= 236).	Was applied on subordinates the abusive supervision active-aggressive 5-items from Mitchell and Ambrose 10-items scale (2007).	Was found positively correlated abusive supervision with (CWB-O); also, was found significant the interaction for conscientiousness, agreeableness, and emotional stability, when these was low, the relation between abusive supervision and CWB-O was stronger.	The cross-sectional and limits infer causality; also, the variable CWB-O was self-reported and could be potential method bias.
138	Sungu et al. (2020)	2020	Definition of abusive supervision from Tepper's (2000) was used.	Goal-setting theory.	Goal commitment moderated the relation between abusive supervision with job performance and organizational deviance. Motivation control and self-defeating cognition mediated the relation.	One longitudinal study in Kenya (T1, T2 and T3, three months apart). Investigate on dyads the subordinates perception of abusive supervision.	Dyads of supervisor and subordinate from a mainstream media house corporation (N= 127).	Was applied on subordinates the 15-items scale from Tepper's (2000).	Was found positive and significant the interaction of AS with goal commitment predicting job performance, and negative and significant predicting organizational deviance; as well, was found significant the interaction of AS with goal commitment predicting motivation control and self-defeating cognition.	The sample were just from one organization. And AS was researched has antecedent of deviance.
139	Tariq and Ding (2018)	2018	Definition of abusive supervision from Tepper's (2000) was used.	Social exchange theory, power dependence theory, self-determination theory and action identification theory.	Study 1, family motivation moderated the relation between abusive supervision and job performance and turnover intentions. Study 2, the same mechanisms, and intrinsic motivation mediated the relation.	Two studies in China. Study 1, a longitudinal study (T1, T2 and T3, one month apart). Investigate on dyads the subordinates perception of abusive supervision. Study 2, a daily study (One survey, and after one week; for ten consecutives working days). Investigate on subordinates their perception of abusive supervision.	Study 1, dyads of supervisor and subordinate from multinational retail corporation (N= 540 subordinates, and N= 133 supervisors). Study 2, employed from different companies (N= 320).	Study 1, was applied on subordinates only the 15-items scale from Tepper's (2000). Study 2, was applied on subordinates 5-items from the 15-items scale from Tepper's (2000).	Study 1, was found negatively correlated abusive supervision with job performance, and positively correlated with turnover intentions; also, was found the relation between abusive supervision and job performance and turnover intentions was weaker when family motivation is high. Study 2, same findings of study 1, and was found a indirect effect of abusive supervision on job performance and turnove…	The subjective measures for Chinese context, and the sample were from private and public organizations.
140	Tariq and Weng (2018)	2018	Definition of abusive supervision from Tepper's (2000) was used.	Moral exclusion theory.	Both studies, abusive supervision mediated the negative relation between perceived and objective performance, this relation is moderated by cooperative and competitive goal interdependence.	Two longitudinal studies in China. Study 1 (T1, T2 and T3, one month apart). Investigate on supervisors the own intentions of abusive supervision. Study 2 (T1, T2, T3 and T4, one month apart). Investigate on dyads the subordinates perception of abusive supervision.	Study 1, supervisors from a multinational retail corporation (N= 285). Study 2, dyads of supervisor and subordinate from a multinational retail corporation (N= 1,255 subordinates, and N= 385 supervisors).	Study 1, was applied on supervisors the abusive supervision active-aggressive 5-items from Mitchell and Ambrose 10-items scale (2007). Study 2, was applied on subordinates only the 15-items scale from Tepper's (2000).	Study 1, was found negatively related subordinate performance with abusive supervision, and was found positively related the interaction between subordinate performance supervisor–subordinate competitive goal to abusive supervision. Study 2, same findings of study 1; also, was support cooperative and competitive goal interdependence moderated the relation of perceptions of performance and abusive…	Was only few antecedents of abusive supervision and moderating mechanisms; also, the abuse can occur with peers.
141	Tariq et al. (2021)	2021	None.	Social comparison theory.	Supervisor envy mediated the positive relation between subordinate performance and abusive supervision, this relation is moderated by supervisor social comparison orientation.	One longitudinal study in China (T1, T2, and T3, one month apart). Investigate on dyads the subordinates perception of abusive supervision.	Dyads of supervisor and subordinate from multinational retail corporation (N= 398 subordinates, and N= 99 supervisors).	Was applied on subordinates the 15-items scale from Tepper's (2000).	Was found negatively correlated subordinate performance with abusive supervision, and was found positively and significantly correlated supervisor envy with abusive supervision; as well, was found positive and significant the indirect effect of subordinate performance on abusive supervision via supervisor envy.	Abusive supervision were measured by frequency and not by intensity/severity; also, the measures were at individual level. As well, was only measure subordinate performance and not the supervisor performance.
142	Taylor et al. (2019)	2019	Definition of abusive supervision from Tepper's (2000) was used.	Social cognitive theory.	Study 1, supervisor relational disidentification mediated the relation between abusive manager behavior and abusive supervisor and ethical leadership. Study 2, supervisor moral identity moderated the relation between abusive manager behavior and supervisor relational disidentification. Study 3, mechanisms from studies 1 and 2.	Three studies in USA and India. Study 1, a experimental study in USA. Investigate on supervisors the perception of managers abusive supervision. Study 2, a experimental study (T1 and T2, two weeks apart) in USA. Investigate the same of study 1. Study 3, a cross-sectional study in India. Investigate on teams the perception of abusive supervision.	Study 1, was employed registered with Amazon’s MTurk (N= 288). Study 2, employed from different companies (N=462). Study 3, teams of supervisor and subordinates from different companies (N= 100 teams, N= 500 subordinates, and N= 100 supervisors).	Studies 1 and 2, was applied on subordinates 3-items from Mitchell and Ambrose 10-items scale (2007). Study 3, was applied the 15-items scale from Tepper's (2000).	Study 1, was found participants with high disidentification condition who experienced manager abuse reported less abusive supervision. Study 2, was found a stronger positive effect of manager abuse on disidentification among participants with higher moral identity levels. Study 3, was found positive the indirect effect of manager abuse on ethical behavior with high levels of moral identity, but w…	Studies 1 and 2, was based on hypothetical scenarios; also, this studies not captured the nature of abusive supervision. As well, the framework used not include cognitive, affective or behavioral mechanisms.
143	Tepper et al. (2011)	2011	Definitions of abusive supervision from Tepper's (2007) was used.	Moral exclusion theory and social identity theory.	Perceived relationship conflict partially mediated the relation between the perceived deep-level dissimilarity with a subordinate and abusive supervision, and supervisor evaluation of subordinate performance moderated the relation.	One longitudinal study in USA (T1 and T2, six weeks apart). Investigate on dyads the subordinates perception of abusive supervision.	Dyads of supervisor and subordinate from seven health care organizations (N= 183).	Was applied on subordinates only the 15-items scale from Tepper's (2000).	Was found positively correlated perceived dissimilarity with relationship conflict and abusive supervision; also, positively correlated relationship conflict with abusive supervision.	All the variables were measured the both times, and cannot rule out common method bias. As well, all the sample were from the health care sector.
144	Thompson et al. (2020)	2020	Definition of abusive supervision from Tepper's (2000) was used.	Social exchange theory and LMX theory.	On both studies, work-related affect and abusive supervision mediated the relation between follower performance and social loafing. The relation is moderated by LMX.	Two cross-sectional studies in Norway. Both , investigate on dyads the subordinates perception of abusive supervision.	Study 1, dyads of supervisor and subordinate from different organizations (N= 493). Study 2, dyads of supervisor and subordinate from different organizations (N= 532).	Both studies, applied on subordinates only the 15-items scale from Tepper's (2000).	Study 1, was found significantly and negatively correlated follower work performance to AS, and significantly and negatively correlated LMX to AS. Study 2, was found positive relation between AS and work-related affect.	The cross-sectional design does not allow to make causal inference.
145	Tillman et al. (2018)	2018	Definition of abusive supervision from Tepper's (2000) was used.	Affective events theory.	On both studies, hope and affective commitment mediated the relation between abusive supervision and turnover intentions.	Two studies in USA. Study 1, a cross-sectional study. Investigate on subordinates their perception of abusive supervision. Study 2, a experimental study. Investigate the same of study 1.	Study 1, employed engineers (N=209). Study 2, students from six public universities (N= 427).	On both studies, was applied on subordinates only the 15-items scale from Tepper's (2000).	Study 1, was found negative and significant the relation between abusive supervision and hope. Study 2, the same findings of study 1; and, was found a partial mediation on the relation between abusive supervision and turnover intentions.	The field study was only on one industry and was predominantly male.
146	Valle et al. (2019)	2019	Definition of abusive supervision from Tepper's (2000) was used.	Social exchange theory and social cognitive theory.	Moral disengagement mediated the positive relation between abusive supervision and deviance; and, leader-member exchange (LMX) moderated this relation.	One longitudinal study in USA (T1 and T2, six weeks apart). Investigate on subordinates perception of abusive supervision.	Employed registered with uSamp (N= 206).	Was applied on subordinates only 6-items from the 15-items scale from Tepper's (2000). Used previously by Harris et al. (2011).	Was found positive and significant the relation between abusive supervision and moral disengagement, and was significant the direct effect between abusive supervision and organizational deviance; as well, was found stronger the indirect effect from abusive supervision to organizational deviance through moral disengagement when LMX is high.	Was the strong inverse relation between LMX and abusive supervision; also, the lack to discern the extent to which abuse has occurred.
147	Van Hoof et al. (2015)	2015	Definition of abusive supervision from Tepper's (2000) was used.	Cultural dimensions theory.	The positive relation between forms of workplace harassment and employees’ intentions to leave.	One cross-sectional study in Ecuador. Investigate on subordinates their perception of supervisors’ behaviors.	Hospitality students from public and private universities (N= 305).	Was applied on subordinates only 6-items from the 15-items scale from Tepper's (2000). Used previously by Harris et al. (2011).	Was found significantly negatively related abusive supervision with supervisor emotional support and supervisor instrumental support; also, abusive supervision was found was significantly and positively related to employee turnover intentions.	The sample were students with limited work experience; also, the data were collected with self-reports surveys.
148	Velez and Neves (2016)	2016	Definition of abusive supervision from Tepper's (2000) was used.	Job demands–resources (JD-R) model.	Psychosomatic symptoms mediated the relation between abusive supervision and production deviance, and job autonomy moderated this relation.	One cross-sectional study (country not mentioned). Investigate on dyads the subordinates perception of abusive supervision.	Dyads of supervisor and subordinate from four organizations from different sectors (N=170).	Was applied on subordinates only the 15-items scale from Tepper's (2000).	Was found significant the relation between abusive supervision and production deviance; also, was found significant the interaction between abusive supervision and job autonomy, and was significant the relation between abusive supervision and psychosomatic symptoms only when job autonomy was low.	Concerns about common method variance, because data was collected from same source (only subordinate); and, the measure of psychosomatic symptoms these was measured with six physical symptoms these could also be to other factors.
149	Vogel and Mitchell (2017)	2017	Definition of abusive supervision from Tepper's (2000) was used.	Theory on diminished self-esteem.	All studies, self-esteem mediated the relation between abusive supervision and workplace deviance and self-presentational behavior, this relation is moderated by turnover intentions.	Three studies. Study 1, a longitudinal study, country not mentioned (T1 and T2, one month apart). Investigate on subordinates their perception of abusive supervision. Study 2, a longitudinal study in USA (T1 and T2, one month apart). Investigate the same of study 1. Study 3, a daily study, country not mentioned (one day, and after one week, 21 consecutive working days). Investigate the same of st…	Study 1, was employed registered with StudyResponse project (N= 172). Study 2, employed from different industries (N=221). Study 3, employed from different industries (N=73).	All studies applied on subordinates the abusive supervision active-aggressive 5-items from Mitchell and Ambrose 10-items scale (2007).	Study 1, was found significant the interaction between abusive supervision and turnover intentions on self-esteem; also, was stronger the relation between abusive supervision and self-esteem when turnover intentions were lower. Study 2, same findings of study 1. Study 3, as well, same findings of studies 1 and 2, these on the daily interaction.	Data was collected from one source and self-report limits causal inferences.
150	Vogel et al. (2015)	2015	Definition of abusive supervision from Tepper's (2000) was used.	Integration of fairness heuristic theory.	Study 1, interpersonal justice mediated the relation between abusive supervision and outcomes, culture moderated the relation. Study 2, the same mechanisms, and power distance orientation (PDO) mediated the moderating effect of culture.	Two studies. Study 1, a cross-sectional study in Australia, USA, Singapore and Taiwan. Investigate on subordinates their perception of abusive supervision. Study 2, a longitudinal study in USA and Taiwan. Investigate the same of study 1.	Study 1, MBA students who work in different companies (N= 951). Study 2, also MBA students who work in different companies (N= 278).	On both studies, was applied on subordinates the 15-items scale from Tepper's (2000).	Study 1, was found significant the interaction between abusive supervision and culture on interpersonal justice, and was found stronger negative the indirect effect of perceived abusive supervision on work effort and trust. Study 2, the same findings of study 1, and was found stronger negative the effects of abusive supervision on interpersonal justice when PDO was low.	The research was focused just on two cultures, and the data limited to make causal inferences on variables.
151	Vogel et al. (2016)	2016	Definition of abusive supervision from Tepper's (2000) was used.	Reactance theory.	Positive relation between abusive supervision and deviant workplace behaviors; also, a negatively relation between public service motivation (PSM) and deviant workplace behaviors, these last relation is moderated by employment sector.	One cross-sectional study in Germany and USA. Investigate on subordinates their perception of abusive supervision.	Employed from different sectors (N=150).	Was applied on subordinates only the abusive supervision 10-items scale from Mitchell and Ambrose (2007).	Was found positive the relation between abusive supervision and employee deviance.	The research design (cross-sectional) limited to make causal claims, and under this design data a potential problem is common method bias (CMB).
152	Waldman et al. (2018)	2018	Definition of abusive supervision from Tepper's (2000) was used.	Self-control theory.	Political skill and executive control moderated the relation between narcissism and abusive supervision.	One cross-sectional study in USA. Investigate on dyads the subordinates/peers perception of abusive supervision.	Dyads of supervisor and subordinate or peer from military and business organizations (N= 56).	Was applied on subordinates the abusive supervision 10-items scale from Aryee et al. (2007).	Was found positive and significant the relation between narcissism and abusive supervision when political skill is low in supervisors, and was found negatively related executive control to abusive supervision. As well, was found negative and significant the relation between political skill and abusive supervision when executive control is low in supervisors.	The size of the sample was relatively limited; also, the measures was used a single source. Additionally, neuroscience is an emerging area in organizational research.
153	Walsh et al. (2019)	2019	Definition of abusive supervision from Tepper's (2000) was used.	Social exchange theory.	The relation between family-supportive supervision, workplace ostracism and abusive supervision.	Three studies in USA. Study 1, a pilot experimental study. Investigate on subordinates their perception of abusive supervision. Studies 2 and 3, not measure abusive supervision.	Study 1, employed registered with Amazon’s MTurk (N= 214).	Was applied on subordinates the abusive supervision active-aggressive 5-items from Mitchell and Ambrose 10-items scale (2007).	Was found positively correlated lack of family-supportive supervision and abusive supervision.	Under cross-sectional design common bias can exist, and limited causal inferences.
154	Walter et al. (2015)	2015	Definition of abusive supervision from Tepper's (2000) was used.	Moral exclusion theory.	Study 1, outcome dependence and liking moderated the negative relation between perceived subordinate performance and abusive supervision. Study 2, the same mechanisms, adding the outcome of objective subordinate performance.	Two studies. Study 1, a experimental study in the Netherlands. Investigate on subordinates their self-ratings of abusive supervision. Study 2, a longitudinal study in China (T1 and T2, one month apart). Investigate on dyads the subordinates perception of abusive supervision.	Study 1, university undergraduate student (N= 157). Study 2, dyads of supervisor and subordinate or peer from garment manufacturing company (N= 169).	Study 1, was applied on subordinates 12-items of the 15-items scale from Tepper's (2000). Study 2, was applied only on subordinates the 15-items scale from Tepper's (2000).	Study 1, was found more pronounced abusive supervision on subordinate with lower performance than in higher performance. Study 2, was found negatively related abusive supervision and objective subordinate performance; also, was found negatively associated perceived performance and outcome dependence to abusive supervision.	Few inconsistencies between individual studies; as was, the independent variables were manipulated in the first study, in the field the majority of subordinates did not fall on the extreme ends of the measurement scales; also, some hypothesis was only examined in the second study.
155	Wang and Jiang (2014)	2014	Definition of abusive supervision from Tepper's (2000) was used.	Dynamic self-regulatory processing model.	Narcissism moderated the positive relation between abusive supervision and deviant behaviors.	One cross-sectional study in China (collected on two points of time, one week apart). Investigate on subordinates their perception of abusive supervision.	Employed from an adult school (N= 308).	Was applied on subordinates the 15-items scale from Tepper's (2000).	Was found negatively related narcissism to abusive supervision, and was found positively correlated abusive supervision to subordinates' deviance toward the supervisor; as well, was found significant the interaction of abusive supervision and narcissism.	Was only examined narcissism with abusive supervision and employees self-reported behavioral.
156	Wang and Jiang (2015)	2015	Definition of abusive supervision from Tepper's (2000) was used.	Fairness theory.	Study 1, interactional justice mediated the negatively relation between abusive supervision and voice and silence. On study 2, organizational attribution moderated this relation.	Two studies in China. Study 1, a experimental scenario study. Investigate on subordinates their perception of abusive supervision. Study 2, a cross-sectional study (collected on two points of time, one week apart). Investigate the same of study 1.	On both studies were employed from an adult school. Study 1 (N=196), and study 2 (N= 379).	On both studies was applied on subordinates the 15-items scale from Tepper's (2000).	Study 1, was found negatively correlated abusive supervision to interactional justice; and, was found significant the indirect effect abusive supervision on voice and silence through interactional justice. Study 2, was found negatively related abusive supervision to voice and silence; as well, was found a negative relation between abusive supervision and interactional justice.	The data was collected by self-reported; also, the cross-sectional designs limits causal inferences, and was focused only on employees.
157	Wang et al. (2012)	2012	Definition of abusive supervision from Tepper's (2000) was used.	Cultural dimensions theory.	Perception of interactional justice mediated the positive relation between abusive supervision and deviant behaviors, this relation is moderated by power distance.	One longitudinal study in China (T1 and T2, nine months apart). Investigate on dyads the subordinates perception of abusive supervision.	Dyads of supervisor and subordinate from six electronic manufacturing companies (N= 283).	Was applied on subordinates only the 15-items scale from Tepper's (2000).	Was found a significantly positive influence of abusive supervision on employees’ organizational deviance, interpersonal deviance and supervisor-directed deviance; and, was found a significantly negative influence of abusive supervision on employees’ perception of interactional justice. As well, was found a significantly positive influence the interaction of abusive supervision and power distance…	The collected data was only on manufacturing industry; also, the measurement scales was adapted, but the original were developed in the western cultural contexts.
158	Wang et al. (2015)	2015	Definition of abusive supervision from Tepper's (2000) was used.	Victim precipitation theory and trait activation theory.	Subordinates’ task performance mediated the relation between neuroticism and conscientiousness with abusive supervision and interpersonal deviance; extraversion and agreeableness moderated this relation.	One longitudinal study (T1 and T2, three weeks apart), the country is not mentioned. Investigate on subordinates their perception of abusive supervision.	Employed from various organizations (N= 376).	Was applied on subordinates the 15-items scale from Tepper's (2000).	Was found positive and significant neuroticism to abusive supervision, but not significant to conscientiousness. As well, was found negative and significant task performance and abusive supervision; and, was not significant the effect of conscientiousness on abusive supervision.	Measured the same source (only subordinate); also, the self-reported data made difficult determine to which supervisors actually engaged in abusive actions.
159	Wang et al. (2016)	2016	Definition of abusive supervision from Tepper's (2000) was used.	Conservation of resources theory.	Employee self-esteem and gender moderated the positively relation between abusive supervision and emotional exhaustion, and intent to leave.	One cross-sectional study in China (collected on two points of time, one week apart). Investigate on subordinates their perception of abusive supervision.	Part-time MBA students from one university who were also employed in different companies (N= 264).	Was applied on subordinates the 15-items scale from Tepper's (2000).	Was found positively correlated abusive supervision to emotional exhaustion and intent to leave; also, was found significantly correlated for female abusive supervision to emotional exhaustion, but not significant for male.	The cross-sectional design limits causal inferences, and were not included related behavioral consequences of abusive supervision.
160	Wang et al. (2021)	2021	Definition of abusive supervision from Tepper's (2000) was used.	Belongingness theory and social exclusion theory.	Perceived ostracism mediated the relation between abusive supervision and turnover intention.	One longitudinal study (country not mentioned)(T1, T2 and T3, one month apart). Investigate on subordinates their perception of abusive supervision.	Employer registered on the platform Questionnaire (N= 300).	Was applied on subordinates the 15-items scale from Tepper's (2000).	Was found positively related AS to perceived coworker and supervisor ostracism and turnover intention.	The AS is team-level variable, and not were explore other mediating variables.
161	Wei and Si (2013a)	2013	Definition of abusive supervision from Tepper's (2000) was used.	Affective events theory.	Organizational identification mediated the relation between psychological contract breach and abusive supervision. And, negative reciprocity moderated the relation.	One cross-sectional study in China. Investigate on dyads the subordinates perception of abusive supervision.	Dyads of supervisor and subordinate from three pharmaceutical companies (N= 268).	Was applied on subordinates only the 15-items scale from Tepper's (2000).	Was found organizational identification partially mediated relation between psychological contract breach and abusive supervision. And, was found a full moderated of negative reciprocity belief on the relation between psychological contract breach and abusive supervision.	The study was only on one point of time. Also, abusive supervision was measured only from the subordinate.
162	Wei and Si (2013b)	2013	Definition of abusive supervision from Tepper's (2000) was used.	Reciprocity theory and theory of displaced aggression.	Locus of control and perceived mobility moderated the positive relation between abusive supervision and counterproductive work behavior (CWB).	One cross-sectional study in China. Investigate on dyads the subordinates perception of abusive supervision.	Dyads of supervisor and subordinate from a multinational company (N= 198).	Was applied on subordinates only the 15-items scale from Tepper's (2000).	Was found positively related abusive supervision to CWB (subordinates’ sabotage, withdrawal, production deviance and theft); and, was found locus of control moderated the relation between abusive supervision and CWB; also, perceived mobility partially moderated the relation.	Is a cross-sectional study this limit causal inferences; and, the sample is for the same organization.
163	Wheeler et al. (2013)	2013	Definition of abusive supervision from Tepper's (2000) was used.	Self-regulation theory.	Emotional exhaustion mediated the positive relation between abusive supervision and co-worker abuse; and, psychological entitlement moderated the relation.	One daily study in USA (five consecutive working days). Investigate on subordinates their perception of abusive supervision.	Employed from variety of industries (N= 132).	Was applied on subordinates the 11-items scale from Harris et al. (2007).	Was found significantly abusive supervision with co-worker abuse, exhaustion and entitlement.	Not examine emotion-regulation; also, findings were self-report data.
164	Whitman et al. (2013)	2013	Definition of abusive supervision from Tepper's (2000) was used.	Self-regulation theory.	Political skill moderated the positive relation between psychological entitlement and abusive supervision.	One cross-sectional study in USA. Investigate on dyads the subordinates perception of abusive supervision.	Dyads of supervisor and subordinate (nurses), from an licensing agency (N= 132).	Was applied on subordinates the 11-items scale from Harris et al. (2007).	Was found significantly and positively related entitlement with abusive supervision, and the effect was reduced by higher political skill.	The sample was of mostly female; as well, is possible was some bias associated with self-evaluations.
165	Wisse and Sleebos (2016)	2016	Definition of abusive supervision from Tepper's (2000) was used.	None.	The relation of position power with dark triad and abusive supervision.	One cross-sectional study in Netherlands. Investigate on teams the subordinates perception of abusive supervision.	Team of supervisor and subordinates from variety of industries (N= 225).	Was applied on subordinates only the 15-items scale from Tepper's (2000).	Was found Machiavellianism associated with high level of abusive supervision when supervisors have high position power, but not on lower power position.	The study was conducted in a country with a rather low power distance.
166	Wu et al. (2013)	2013	Definition of abusive supervision from Tepper's (2000) was used.	Job demands–resources (JD-R) model.	Study 1, the relation between abusive supervision and workload demands from supervisor (WDS). Study 2, perceived job characteristics (PJCs) moderated the relation between abusive supervision and WDS and emotional exhaustion (EE).	Two cross-sectional studies in Taiwan. Both studies investigate on subordinates their perception of abusive supervision.	Study 1, students who worked in various industries (N= 150). Study 2, employed from different companies (N= 222).	Both studies applied on subordinates the abusive supervision active-aggressive 5-items from Mitchell and Ambrose 10-items scale (2007).	Study 1, was found abusive supervision and WDS are two distinct stress related constructs. Study 2, was found positively related abusive supervision and WSD to EE; and, PJCs not moderated the relation between abusive supervision and EE.	The data was cross-sectional and cannot avoid the problem of causality.
167	Xu et al. (2012)	2012	Definition of abusive supervision from Tepper's (2000) was used.	Justice theory and reactance theory.	LMX mediated the relation between abusive supervision and subordinates’ performance, organizational citizenship behavior (OCB) organization (OCBO) and individuals (OCBI).	One cross-sectional study in China. Investigate on dyads the subordinates perception of abusive supervision.	Dyads of supervisor and subordinate from telecommunications company (N= 366 subordinates, and N= 141 supervisors).	Was applied on subordinates only the 15-items scale from Tepper's (2000).	Was found negatively related abusive supervision to LMX; also, was found significantly and negatively related abusive supervision to performance, OCBO, and OCBI.	Because was a cross- sectional study was unable to draw firm conclusions about causation. Also, a concerns over accuracy because OCBI was rated by supervisors.
168	Xu et al. (2019)	2019	Definition of abusive supervision from Tepper's (2000) was used.	Transactional model of stress.	On both studies, organizational identification and positive affectivity moderated the negative relations between abusive supervision and proactive behavior.	Two cross-sectional studies in China. Both studies investigate on dyads the subordinates perception of abusive supervision.	Study 1, dyads of supervisor and subordinate from two public stomatology hospitals (N= 165 subordinates, and N= 41). Study 2, dyads of supervisor and subordinate from 52 stations of transportation company (N= 226).	Study 1, was applied on subordinates only the abusive supervision active-aggressive 5-items from Mitchell and Ambrose 10-items scale (2007). Study 2, was applied on subordinates only the 15-items scale from Tepper's (2000).	Study 1, was found negatively related abusive supervision to personal initiative; also, was found significantly the interaction of abusive supervision and organizational identification, as well, the interaction with positive affectivity to personal initiative. Study 2, was found not significantly related abusive supervision to proactive behavior, but was found significantly negative on the relati…	Both studies were measured at one point in time. And, the data were collected from samples in the two type of industries.
169	Yu and Duddy (2021)	2021	Definition of abusive supervision from Tepper's (2000) was used.	Social functional view of emotions.	All the studies, guilt and anger mediated the relation between abusive supervision and supervisor directed deviance and OCBs, this relation is moderated by attribution of a performance promotion and injury initiation.	Three studies. Study 1, a longitudinal study in China (T1, T2 and T3 two weeks apart). Investigate on dyads the subordinates perception of abusive supervision. Study 2, a laboratory experiment in USA. Investigate on subordinates their perception of abusive supervision. Study 3, a daily study in Sweden (fifteen working days). Investigate on dyads the subordinates perception of abusive supervision.	Study 1, dyads of soldier and officer from a branch of the national military force (N=286). Students and employed from a University (N= 156). Study 3, dyads of supervisor and subordinate from a luxury vehicles company (N= 101).	Studies 1 and 2, applied on supervisor only the 15-items scale from Tepper's (2000). Study 3, applied only on subordinates the 5-items scale from Johnson et al. (2012).	Study 1, was found significantly interacted AS with injury initiation attribution to predict anger and with performance promotion attribution to predict guilt. Study 2, was found after controlled AS and attributions conditions, anger was significant to deviance and guilt to OCBs. Study 3, was found significantly positive the indirect effect of AS to supervisor-directed behaviors via guilt when AS…	On all the studies, attribution affected the reactions (emotion and behavior).
170	Yu et al. (2018)	2018	Definition of abusive supervision from Tepper's (2000) was used.	None.	On both studies, self-esteem threat mediated the positive relations between downward envy and abusive supervision and self-improvement; also, warmth and competence moderated this relation.	Two longitudinal studies in China. Study 1 (T1 and T2, one month apart; T3 two months after T2; and T4, three months after). Investigate on dyads the subordinates perception of abusive supervision. Study 2 (T1 and T2, one month apart; T3 two months after T2). Investigate the same of study 1.	Study 1, dyads of supervisor and subordinate from management-consulting company (N= 216). Study 2, dyad of supervisor and subordinate from natural gas company (N= 225).	Both studies applied on subordinates only the 15-items scale from Tepper's (2000).	Study 1, was found positively related downward envy to abusive supervision, and was found strongest the indirect effects of downward envy on abusive supervision through self-esteem when warmth was low and competence was high. Study 2, also same findings of study 1; and, self-esteem was found negatively to abusive supervision.	Not explore whether performing the adaptive behaviors of abusive supervision and self-improvement; and, were not explore how direct reports respond to downward envy.
171	Zhou (2016)	2016	Definition of abusive supervision from Tepper's (2000) was used.	Situational strength theory.	Abusive supervision variability moderated the negative relation between abusive supervision and occupational citizenship behaviors (OCB) and job performance.	One longitudinal study in China (T1 and T2, nine months apart). Investigate on dyads the subordinates perception of abusive supervision.	Dyads of supervisor and subordinate from six manufacturing companies (N= 242).	Was applied on subordinates only the 15-items scale from Tepper's (2000).	Was found negatively related abusive supervision to job performance and OCB, and was stronger when abusive supervision variability was low.	The operationalization of abusive supervision variability, and were not examine these on subordinates’ outcomes.
